# Temporal and state abstractions for efficient learning, transfer and composition in humans

Liyu Xia, Anne G. E. Collins

*University of California, Berkeley*

---

## Abstract

Humans use prior knowledge to efficiently solve novel tasks, but how they structure past knowledge to enable such fast generalization is not well understood. We recently proposed that hierarchical state abstraction enabled generalization of simple one-step rules, by inferring context clusters for each rule. However, humans' daily tasks are often temporally extended, and necessitate more complex multi-step, hierarchically structured strategies. The options framework in hierarchical reinforcement learning provides a theoretical framework for representing such transferable strategies. Options are abstract multi-step policies, assembled from simpler one-step actions or other options, that can represent meaningful reusable strategies as temporal abstractions. We developed a novel sequential decision making protocol to test if humans learn and transfer multi-step options. In a series of four experiments, we found transfer effects at multiple hierarchical levels of abstraction that could not be explained by flat reinforcement learning models or hierarchical models lacking temporal abstraction. We extended the options framework to develop a quantitative model that blends temporal and state abstractions. Our model captures the transfer effects observed in human participants. Our results provide evidence that humans create and compose hierarchical options, and use them to explore in novel contexts, consequently transferring past knowledge and speeding up learning.

*Keywords:* Hierarchical Reinforcement Learning, The Options Framework, Transfer Learning

---

## 1 **1. Introduction**

2       Recent advances have shown that reinforcement learning algorithms (RL,  
3 [1]) can give rise to extremely powerful artificial intelligence (AI) systems  
4 ([2, 3]). RL modeling has also greatly helped advance our understanding  
5 of human behavior ([4, 5, 6, 7, 8, 9]). However, despite tremendous recent  
6 progress, artificial RL agents are unable to mimic and capture humans' ability  
7 to learn fast, efficiently, as well as transfer and generalize knowledge ([10, 11,  
8 12]).

9       Human behavior and cognition possesses two key features that are essen-  
10 tial to humans' efficient and flexible learning: cognitive representations are  
11 hierarchical ([13, 14, 15, 16]) and compositional ([10]). Hierarchy has been  
12 identified as a crucial element of cognition in multiple domains such as percep-  
13 tion ([17, 18, 19, 20]), decision making ([21, 22, 23, 16, 24, 25, 26, 27, 28, 29]),  
14 and learning [30, 31, 9, 32, 29]. Hierarchy in choices is often temporal  
15 ([33, 34]): choices may be described at multiple degrees of granularity by  
16 breaking them down into more and more basic chunks. For example, the  
17 task of making dinner can be broken down to making potatoes and making  
18 black beans; making potatoes can be broken down into sub-tasks such as cut-  
19 ting potatoes, roasting, etc. However, hierarchical levels may also represent  
20 different degrees of state abstractions at a similar time scale([14, 16, 9, 35]):  
21 for example, you may decide to make dinner (highest, most abstract level),  
22 which will consist of a salad, which will specifically be a Cesar salad (lowest,  
23 most concrete level).

24 Human behavior is also compositional: humans are able to compose sim-  
25 pler skills together in novel ways to solve new tasks in real life. For example,  
26 we can combine cutting potatoes with different routines to accomplish var-  
27 ious tasks including fried potatoes, meshed potatoes, etc. Compositionality  
28 goes hand in hand with hierarchy, as it assumes the existence of different  
29 levels of skills. It has also been central to the study of human cognition  
30 ([36, 37, 38]) and artificial agents ([39, 40, 41, 42]).

31 The hierarchical reinforcement learning (HRL) options framework [43],  
32 originally proposed in AI, incorporates both hierarchy and compositionality  
33 features in an effort to make learning more flexible and efficient. The options  
34 framework augments traditional RL algorithms with temporal abstractions  
35 called options. Broadly summarized, options are temporally-extended multi-  
36 step policies assembled from simple actions or other options to achieve a  
37 meaningful subgoal (see [43] for a formal definition). Consider making pota-  
38 toes as an example option. We can break down the task into sub-options  
39 such as cutting potatoes, roasting, etc. These sub-options can be further  
40 divided into simpler tasks. In the HRL options framework, agents can learn  
41 option-specific policies (e.g. how to make potatoes) by using, for example,  
42 subgoals as pseudo-rewards that reinforce within-option choices. Options are  
43 referred to as *temporal abstractions* because selecting an option is a single  
44 decision step, but this single decision may itself contain a series of decisions,  
45 so that time is compressed in a single decision.

46 Each option is additionally characterized by an initiation set (the set of

47 states where the option can be initiated), and a termination function that  
48 maps each state to the probability of terminating the current option. For ex-  
49 ample, the initiation set for the option of making potatoes might be kitchen,  
50 and the option might terminate when the potatoes are cooked. Agents can  
51 also learn when to select options (e.g. make potatoes for breakfast in the  
52 US, but not in France) by using normal reinforcement signals.

53 The options framework provides many theoretical benefits for learning  
54 ([11, 44]), assuming that useful options are available. Unlike traditional RL  
55 algorithms that only learn step-by-step policies, options help explore more  
56 efficiently and plan longer term. For example, when we learn how to cook a  
57 new kind of potato, we already know how to cut potatoes. Moreover, we can  
58 plan with high-level behavioral modules such as cutting potatoes, instead of  
59 planning in terms of reaching, grabbing, and peeling. If non-useful options  
60 are available, the options framework predicts that learning is instead slowed  
61 down [11]. The question of how to identify and create useful options has  
62 been a topic of active and intense research in AI ([45, 46, 47, 48, 49, 50, 51,  
63 52, 53, 54]).

64 Note that the options framework is not the first attempt to incorporate  
65 hierarchy and compositionality to model complex human cognition. Within  
66 psychology in particular, “option” echoes the idea of “chunking” in cognitive  
67 architecture literature ([55, 56]). However, one distinct aspect of the options  
68 framework is its objective of reward maximization ([11]), which is naturally  
69 inherited as an augmentation of traditional flat RL (although see ([57, 58])

70 for initial work on combining ideas from reward maximization of RL with  
71 cognitive architectures). Importantly, this objective of reward maximization  
72 has proven to be relevant and instrumental in revealing neural mechanisms  
73 underlying learning and adaptation ([59]).

74 Moreover, recent literature ([12, 60, 61, 62, 63]) provides behavioral and  
75 neural support for options as a useful model of human learning and decision  
76 making. [12, 63] showed that participants were able to spontaneously iden-  
77 tify bottleneck states from transition statistics, which aligned with graph-  
78 theoretic objectives for option discovery developed in AI ([46]). In addition,  
79 in hierarchical decision-making tasks, [60, 61, 62] showed that human par-  
80 ticipants signaled reward prediction error (RPE), a key construct for RL  
81 algorithms, for both subgoals and overall goals. These results indicate that  
82 humans are able to identify meaningful subgoals, and to track sub-task pro-  
83 gression, both key features of the options framework. [64, 65] have also sug-  
84 gested potential neural correlates to implementing the computations required  
85 to use options.

86 However, the fundamental question of whether and how humans learn  
87 and use options during learning remains unanswered ([12]): there is little  
88 work probing the learning dynamics in tasks with a temporal hierarchy, or  
89 directly testing the theoretical benefits of options in a behavioral setting. In  
90 particular, do humans create options in such a way that they can flexibly  
91 reuse them in new problems? If so, how flexible is this transfer? Previous  
92 research ([9, 32, 66]) showed evidence for flexible creation and transfer of

93 a simple type of options that operate in non-sequential environments: one-  
94 step policies, also called task-sets ([67]). [9, 32, 66] showed that humans can  
95 create multiple task-sets over the same state space in a context-dependent  
96 manner in a contextual multi-armed bandit task. Furthermore, humans can  
97 cluster different contexts together if the task-set is successful. This clustering  
98 structure provides opportunities for transfer, since anything newly learned  
99 for one of the contexts can be immediately generalized to all the others in  
100 the same cluster. Moreover, human participants can identify novel contexts  
101 as part of an existing cluster if the cluster-defined strategy proves successful,  
102 resulting in more efficient exploration and faster learning.

103 However, the task-sets framework only supports hierarchy in “state/action  
104 space abstraction”, not hierarchical structure in time (also called “temporal  
105 abstraction”), an essential component of the options framework. Here, we  
106 propose that combining state abstraction from task-set transfer ([9, 32, 66])  
107 and temporal abstraction from the options framework ([43]) can provide im-  
108 portant insights into complex human cognition. The additional temporal  
109 hierarchical structure offered by options should enable transfer of prior knowl-  
110 edge at multiple levels of hierarchy, providing rich opportunity for capturing  
111 the flexibility of human transfer. For example, if humans have learned the  
112 simple sub-option of boiling water while learning how to make coffee, they  
113 do not need to re-learn it for learning to make tea or steamed potatoes; this  
114 sub-option can instead be naturally incorporated into a tea-making option,  
115 speeding up learning.

116 In this paper, we present a new experimental protocol that allows us to  
117 test whether humans create options when learning, and whether they use  
118 them in new contexts to explore more efficiently and transfer learned skills,  
119 at multiple levels of hierarchy. Our new two-stage learning game provides  
120 participants opportunities to create and transfer options at multiple levels  
121 of complexity. We also present a formal computational model that brings  
122 together aspects of the classic hierarchical RL options framework with the  
123 task-set model’s clustering and transfer Bayesian inference mechanisms. The  
124 model combines the benefits of both frameworks and makes specific predic-  
125 tions about option learning, transfer and exploration. Given that humans  
126 can transfer task-sets to novel contexts ([9, 32, 66]), we hypothesized that  
127 humans would learn and transfer options to guide exploration and achieve  
128 better learning performance, as captured by the model. Results of four exper-  
129 iments (3 replicated in an independent sample), testing different predictions  
130 in the same framework, showed that human participants are able to learn,  
131 flexibly transfer and compose options at multiple levels. Our computational  
132 model captured the observed patterns of behavior, supporting the importance  
133 of hierarchical representations of choices for flexible, efficient, generalizable  
134 learning and exploration.

## 135 **2. Experiment 1**

136 Experiment 1 was designed to test if human participants are able to  
137 learn and flexibly transfer options. We designed a sequential 2-step decision-

138 making paradigm (where each step was a contextual 4-armed bandit) to al-  
139 low participants to learn options at multiple levels of complexities. Options  
140 changed between blocks, but the design provided participants with opportu-  
141 nities to practice reusing previously learned options. In two final test blocks,  
142 we directly tested creation and transfer of options by changing and/or com-  
143 bining previously learned options in novel ways.

## 144 *2.1. Methods*

### 145 *2.1.1. Participants*

146 All experiments were approved by the Institutional Review Board of the  
147 University of California, Berkeley. Experiment 1 was administered in-lab to  
148 UC Berkeley undergraduates who received course credit for their participa-  
149 tion. 34 (22 female; age: mean = 20.6, sd = 1.6, min = 18, max = 24)  
150 UC Berkeley undergraduates participated in Experiment 1, and 9 partici-  
151 pants were excluded due to incomplete data or poor learning performance  
152 (see results), resulting in 25 participants for data analysis.

153 For replication purposes, we also recruited participants through Ama-  
154 zon Mechanical Turk (MTurk) who performed the same experiment online.  
155 Participants were compensated a minimum of \$3 per hour for their participa-  
156 tion, with a bonus depending on their performance to incentivize them. 116  
157 participants (65 female; see age range distribution in Table 3) finished the  
158 experiment. 61 participants were further excluded due to poor performance  
159 (see Sec 2.1.4), resulting in 55 participants for data analysis.



160 2.1.2. Experiment 1 in-lab Protocol

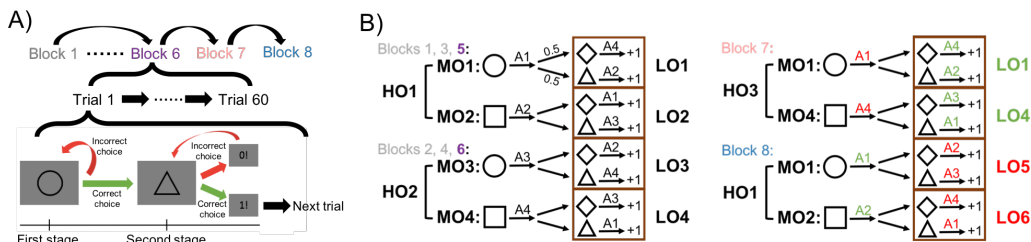

Figure 1: Experiment 1 protocol. (A) Block and trial structure: Blocks 1-6 were learning blocks, followed by two testing blocks: Blocks 7 and 8. Each block had 60 trials. In each trial, participants needed to select the correct response for the first stage stimulus (e.g. circle) in order to move on to the second stage stimulus (e.g. triangle), where they could win points by selecting the correct response. (B) Stimulus-action assignments: In Blocks 1-6, participants had the opportunity to learn options (extended policies) at three levels of complexity: high, middle, and low-level options (*HO*, *MO*, and *LO*). In the testing phase, Block 7 tested participants' ability to reuse *MO* policies outside of their *HO* context, potentially eliciting positive transfer (green) of *LO*s in the second stage, and negative transfer (red) of choices in the first stage. Block 8 tested predicted positive transfer in the first stage, but negative transfer of *MO* policies in the second stage, by replacing old *LO*s by new ones. Blocks were color coded for later result figures: Blocks 1-4 gray; Blocks 5-6 purple; Block 7 rose; Block 8 blue.

161 Experiment 1 consisted of eight 60-trial blocks (Fig. 1), with optional  
 162 20-second breaks in between blocks. In each block, the participants used  
 163 deterministic truthful feedback to learn which of four keys to press for four  
 164 different shapes. Each trial included two stages; each stage involved partici-  
 165 pants making choices in response to a single stimulus (Fig. 1A) by pressing  
 166 one of four keys. Each trial started with one of two possible stimuli, hence-  
 167 forth the first stage stimuli (e.g. circle or square). Participants had 2 seconds  
 168 to make a choice. Participants only moved on to the second stage of the trial  
 169 when they pressed the correct key for the first stage stimulus, or after 10  
 170 unsuccessful key presses, which enabled them to potentially try all four keys

171 for a given stimulus in a single trial. Successful key press for the first stage  
172 of a trial did not result in reward feedback, but triggered a transition to the  
173 second stage, where participants saw one of the two other stimuli, hence-  
174 forth labeled second stage stimuli (e.g. diamond and triangle). Both first  
175 stage stimuli led to both second stage stimuli equally often, and shapes were  
176 randomly assigned to either first or second stage across participants. In the  
177 second stage, participants also could not move on until they selected the  
178 correct choice (or selected wrong 10 times in a row for the same image). Par-  
179 ticipants received explicit feedback after each second stage choice: the screen  
180 indicated 1/0 point for pressing the correct/incorrect key, displayed for 0.5  
181 second (Fig. 1A). After a correct second stage choice, participants saw a  
182 fixation cross for 0.5 second, followed by the next trial's first stage stimulus.  
183 Each block contained 60 trials, with each first stage stimulus leading to each  
184 second stage stimulus 15 times in a pseudo-randomized sequence of trials.

185 Crucially, the correct stimulus-action assignments were designed to allow  
186 for the creation of multi-step policies and to test their grouping into sets of  
187 policies at multiple levels. In particular, second stage correct choices were  
188 dependent on what the first stage stimulus was. This encouraged participants  
189 to make temporally extended choices (potentially options): their second stage  
190 strategies needed to depend on the first stage. Assignments, illustrated in  
191 Fig. 1B, changed across blocks. Blocks 1, 3, 5 shared the same assignments;  
192 Blocks 2, 4, 6 shared the same assignments; this encouraged participants to  
193 not unlearn policies, but rather discover that they could reuse previously

194 learned multi-level policies as a whole in new blocks.

195       Assignments in Blocks 7 and 8 intermixed some of the learning blocks  
196 assignments with new ones to test (positive and negative) transfer of options  
197 at various hierarchy levels. Specifically, the protocol was set up so that  
198 participants could learn up to 3 levels of hierarchical task structure (low, mid,  
199 and high level policies). More precisely, low-level options ( $LO$ ) corresponded  
200 to second stage policies (a pair of stimulus-action associations, commonly  
201 labelled a *task-set*) ([67]). Mid-level options ( $MO$ ) were policies over both  
202 first and second stage stimuli. High-level options ( $HO$ ) were policies over  
203  $MO$ 's (a pair of stimulus- $MO$  associations in the first stage, which could  
204 be thought of as a *task-set over options*). As a concrete analogy, in Blocks  
205 1, 3, 5, the participants learned how to make breakfast ( $HO_1$ ), consisting of  
206 potatoes ( $MO_1$ ) and eggs ( $MO_2$ ). Making potatoes ( $MO_1$ ) was broken down  
207 into cutting potatoes (the first stage) and then roasting (the second stage,  
208  $LO_1$ ). In Blocks 2, 4, 6, participants learned how to make lunch ( $HO_2$ ),  
209 consisting of vegetables ( $MO_3$ ) and sandwich ( $MO_4$ ). Making vegetables  
210 ( $MO_3$ ) was broken down into combining vegetables (the first stage) and then  
211 steaming (the second stage,  $LO_3$ ).

212       Block 7 tested positive transfer of second stage policies and negative trans-  
213 fer of first stage policies. In particular, we combined the policies for potatoes  
214 from breakfast ( $MO_1$ ) and sandwich from lunch ( $MO_4$ ) to form a new pol-  
215 icy  $HO_3$  (dinner). If participants build three levels of options, we expect  
216 positive transfer of mid-level options  $MO_1$  and  $MO_4$ : participants should be

217 unimpaired in making potatoes or a sandwich. However, we expect negative  
218 transfer of high-level options  $HO_1$  and  $HO_2$ : participants seeing that making  
219 potatoes was rewarded might start making eggs as usual, instead of sandwich  
220 as rewarded here.

221 Block 8 tested positive transfer of first stage policies and negative transfer  
222 of second stage policies. In particular, the first stage of Block 8 shared the  
223 same assignments as Blocks 1, 3, 5 in the first stage, allowing participants  
224 to immediately transfer  $HO_1$ . However, the second stage policies ( $LO_5$  and  
225  $LO_6$ ) were novel, which might potentially result in negative transfer: for  
226 example, participants might try to transfer  $LO_1$  (roasting) following  $MO_1$   
227 (make potatoes), but the second stage policy was changed to  $LO_5$  (e.g. fry-  
228 ing).

### 229 *2.1.3. Experiment 1 MTurk Protocol*

230 To replicate our findings, we ran a minimally modified version of Exper-  
231 iment 1 online via MTurk. The task was slightly shortened, due to evidence  
232 that in-lab participants reached asymptotic behavior (Supplementary Fig.  
233 S11) early in a block, and to make the experiment more acceptable to on-  
234 line workers. Blocks 1 and 2 had a minimum of 32 and a maximum of 60  
235 trials, but participants moved on to the next block as soon as they reached  
236 a criterion of less than 1.5 key presses per second stage trial in the last 10  
237 trials (the 55 Mturk participants included for data analysis on average used  
238 42 (SD = 10, median = 37, min = 32, max = 60) trials in Block 1 and 39

239 (SD = 10, median = 33, min = 32, max = 60) trials in Block 2). Blocks 3-8  
240 were all shortened to 32 trials, with each first stage stimulus leading to each  
241 second stage stimulus 8 times.

#### 242 *2.1.4. Data analysis*

243 We used the number of key presses until correct choice in each stage of  
244 a trial as an index of performance. Since the experiment would not progress  
245 unless the participants chose the correct action, more key presses indicates  
246 worse performance. Ceiling performance was 1 press per stage within a trial.  
247 Chance level was 2.5, assuming choosing 1 out of 4 keys randomly, unless  
248 indicated otherwise. To probe for any potential transfer effects, we calculated  
249 the average number of key presses at the beginning of each block (trials 1-10),  
250 before learning has saturated. As a stronger test of option transfer, we also  
251 calculated the probability that the first press for a given stimulus at each  
252 stage of a trial was correct in different blocks.

253 To rule out participants who were not engaged in the task, we excluded  
254 any participant who did not complete Blocks 5-8 within an allotted amount  
255 of time (6 minutes each) - indeed this could only happen if participants often  
256 reached the 10 key presses needed to move on to the next stage without the  
257 correct answer, a clear sign of no engagement.

258 We additionally excluded any participant whose average performance in  
259 the last 10 trials of either first or second stage in either Block 5 or 6 was at  
260 or below chance, since it indicated a lack of learning and engagement in both

261 stages of the task. These exclusion criteria were applied to all experiments,  
262 including Mturk participants. Note that among 116 Mturk participants in  
263 Experiment 1, 104 were above chance in the second stage (the more diffi-  
264 cult one), but only 55 were above chance in the first stage (the easier one).  
265 Thus most participants were excluded due to the first stage performance cri-  
266 terion. The same trend was true for the other two Mturk experiments: most  
267 Mturk participants were excluded due to performance in the first stage in  
268 Experiment 3 and Experiment 4. We hypothesize that the poor first stage  
269 performance in many is due to the task's incentive structure - participants  
270 knew they only earned points (which were converted to monetary bonus for  
271 MTurk participants) in the second stage. All results were qualitatively sim-  
272 ilar to the ones reported in this paper for all experiments when we relaxed  
273 the exclusion criterion to include participants at chance in the first stage.

274 The options framework makes predictions about the specific choices made  
275 in response to a stimulus, beyond whether a choice is correct: the nature  
276 of the errors made can be informative ([9]). We categorized the specific  
277 choices participants made into meaningful choice types, to further test our  
278 predictions about potential option transfer effects. As the choice types were  
279 stage and experiment dependent, we describe the choice type definitions in  
280 the result sections where necessary. When performing choice type analysis,  
281 We only considered the first key press of the first or second stage in each trial  
282 to reduce noise. We also compared reaction time of difference choice types  
283 to test potential sequence learning effects.

284 For statistical testing, we used parametric tests (ANOVAs and paired t-  
285 test) when normality assumptions held, and non-parametric tests (Kruskall-  
286 Wallis and sign test) otherwise.

### 287 *2.1.5. Computational modeling*

288 To quantitatively formalize our predictions, we designed a computational  
289 model for learning and transferring options, inspired by the classic HRL  
290 framework as well as other hierarchical RL literature [9, 43]. We simulated  
291 this model, as well as three other learning models that embody different  
292 hypotheses about learning in this task, to compare which model best captures  
293 patterns of human learning and transfer. All models were simulated 500  
294 times. We did not fit the model to the trial-by-trial choices of participants:  
295 computing the likelihood of the hierarchical models is intractable, because  
296 we only observed the key presses, but not the choice of options. All results  
297 presented in the main text figures were simulated with parameters chosen  
298 to match participants' behavioral patterns qualitatively and quantitatively  
299 well (Table 1). However, our qualitative predictions are largely independent  
300 of specific model parameters: we show in the supplement (Sec. 9.3) that a  
301 single set of parameters (Table 2), consistent across all experiments, makes  
302 the same qualitative predictions regarding transfer effects.

#### 303 *2.1.5.1. The Naive Flat Model.*

304

305 The Naive Flat Model is a classic reinforcement learning model that learns

306 Q-values to guide action selection in response to stimuli. In the first stage, it  
307 learns a Q-value table  $Q^1(F_i, A_j^1)$ , where  $F_1$  and  $F_2$  are two first stage stimuli,  
308  $A_1, \dots, A_4$  are four possible actions. We use superscript to index stage (1  
309 means first stage, 2 means second stage). The Q-values are initialized to  
310 uninformative Q-values  $1/\#\{\text{possible actions}\} = \frac{1}{4}$ . On each choice, a first  
311 stage policy is computed based on the first stage stimulus,  $F_i$ , with the  
312 softmax function:

$$P(A_j^1|F_i) = \frac{\exp(\beta^1 * Q^1(F_i, A_j^1))}{\sum_k \exp(\beta^1 * Q^1(F_i, A_k^1))}, \quad (1)$$

313 where  $\beta^1$  is the inverse temperature parameter. A first stage action  $A^1$ ,  
314 ranging from  $A_1$  to  $A_4$ , is then sampled from this softmax policy. After  
315 observing the outcome (moving on to the second stage or not), the Q-values  
316 is updated with Q-learning ([1]):

$$Q^1(F_i, A^1) = Q^1(F_i, A^1) + \alpha^1 * (r - Q^1(F_i, A^1)), \quad (2)$$

317 where  $\alpha^1$  is the learning rate parameter, and  $r$  is 1 if  $A^1$  is correct and 0  
318 otherwise.

319 In the second stage, the model similarly learns another Q-value table  
320  $Q^2(S_i, A_j^2)$ , where  $S_1$  and  $S_2$  are two second stage stimuli, with learning  
321 rate  $\alpha^2$  and inverse temperature  $\beta^2$ . Note that it disregards the non-  
322 Markovian nature of the task: it learns the Q-values for the two second  
323 stage stimuli without remembering the first stage stimulus. As such, this



324 model is a straw man model that cannot perform the task accurately, but  
325 exemplifies the limitations of classic RL in more realistic tasks, and serves as  
326 a benchmark.

327 At the start of a new block, the Naive Flat Model resets all Q-values to  
328  $1/4$ , and thus has to re-learn all Q-values from scratch. To better account  
329 for human behavior, we also included two forgetting parameters,  $f^1$  and  $f^2$ .  
330 After each choice, the model decays all Q-values for the first stage based on  
331  $f^1$ :

$$Q^1(F_i, A_j^1) = (1 - f^1) * Q^1(F_i, A_j^1) + f^1 * 1/4. \quad (3)$$

332 Forgetting in the second stage is implemented similarly.

333 Participants very quickly learned that the correct second stage action  
334 was different from the first stage one (see results). To account for this meta-  
335 learning heuristic, we add a meta-learning parameter  $m$  that discourages  
336 selecting the same action in the second stage as in the first stage. Specifically,  
337 if  $\pi$  is the second stage policy as computed from softmax, we set  $P(A^1|S_i) =$   
338  $m$ , where  $A^1$  is the action chosen in the first stage, and re-normalize:

$$P(A^{other}|S_i) = (1 - m) \times \pi(A^{other}) / (1 - \pi(A^1)), \quad (4)$$

339 where  $A^{other}$  is any action other than  $A^1$ .

340 Parameters  $f^1$ ,  $f^2$  and  $m$ , which capture memory mechanisms and heuris-  
341 tics orthogonal to option learning, are included in all models and imple-  
342 mented in the same way. In total, the Naive Flat Model has 7 parameters:

343  $\alpha^1, \beta^1, f^1, \alpha^2, \beta^2, f^2, m$ .

344 *2.1.5.2. The Flat Model.*

345

346 The Flat Model extends the Naive Flat Model with a single addition of  
347 first-stage memory, which makes this model able to perform the task well  
348 in both stages. Specifically, in the second stage, the Flat Model remembers  
349 the first stage stimulus by treating each of the 4 combinations of the first  
350 and second stage stimuli as a distinct state and learns Q-values for all 4  
351 combinations. The Flat Model has the same 7 parameters as the Naive Flat  
352 Model.

353 *2.1.5.3. The Task-Set Model.*

354

355 The Task-Set Model is given the capability of transferring previously  
356 learned task-sets (one-step policies) with Bayesian inference. In the first  
357 stage, the model tracks the probability  $P^1$  of selecting each first stage task-set  
358  $HO_i$  in different first stage contexts  $c_j^1$ , which encodes the current temporal  
359 (block) context (e.g. 8 contexts in the first stage of Experiment 1). In  
360 particular, the model uses a Chinese Restaurant Process (CRP) prior to  
361 select  $HO$  ([68]): if contexts  $\{c_{1:n}^1\}$  are clustered on  $N^1 \leq n$   $HO$ 's, when the  
362 model encounters a new context  $c_{n+1}^1$ , the prior probability of selecting a new

363 high-level option  $HO_{n+1}$  in this new context is set to:

$$P^1(HO_{n+1}|c_{n+1}^1) = \frac{\gamma^1}{Z^1}; \quad (5)$$

364 and the probability of reusing a previously created high-level option  $HO_i$  is  
365 set to:

$$P^1(HO_i|c_{n+1}^1) = \frac{N_i^1}{Z^1}, \quad (6)$$

366 where  $\gamma^1$  is the clustering coefficient for the CRP,  $N_i^1$  is the number of first  
367 stage contexts clustered on  $HO_i$ , and  $Z^1 = \gamma^1 + \sum_i N_i^1$  is the normalization  
368 constant. The new  $HO_{n+1}$  policy is initialized with uninformative Q-values  
369  $1/\#\{\text{possible actions}\} = \frac{1}{4}$ . The model samples  $HO$  based on the conditional  
370 distribution over all  $HO$ 'S given the current temporal context. The model  
371 also tracks  $HO$ -specific policies via Q-learning. Once an  $HO$  is selected, a  
372 first stage policy is computed based on the  $HO$ 's Q-values and the first stage  
373 stimulus  $F_i$  with softmax:

$$P(A_j^1|F_i, HO) = \frac{\exp(\beta^1 * Q_{HO}^1(F_i, A_j^1))}{\sum_k \exp(\beta^1 * Q_{HO}^1(F_i, A_k^1))}, \quad (7)$$

374 where  $\beta^1$  is the inverse temperature. A first stage action  $A^1$ , ranging from  $A_1$   
375 to  $A_4$ , is then sampled from this softmax policy. After observing the outcome  
376 (moving on to the second stage or not), the model uses Bayes' Theorem to

377 update  $P^1$ :

$$P^1(HO_k|c_j^1) = \frac{P(r|F_i, A^1, HO_k)P(HO_k|c_j^1)}{(\sum_l P(r|F_i, A^1, HO_l)P(HO_l|c_j^1))}, \quad (8)$$

378 where  $r$  is 1 if  $A^1$  is correct and 0 otherwise, and  $P(r|F_i, A^1, HO_l) = 1 -$   
379  $Q_{HO_l}^1(F_i, A^1)$  if  $r = 0$ , or  $Q_{HO_l}^1(F_i, A^1)$  if  $r = 1$ . Then the Q-values of the  
380  $HO$  with the highest posterior probability is updated:

$$Q_{HO}^1(F_i, A^1) = Q_{HO}^1(F_i, A^1) + \alpha^1 * (r - Q_{HO}^1(F_i, A^1)), \quad (9)$$

381 where  $\alpha^1$  is the learning rate.

382 The second stage runs a separate CRP with  $P^2$ , similar to  $P^1$  in the first  
383 stage, which guides selection of task-sets  $LO$  over second stage stimuli. All  
384 other are identical to the first stage except that the second stage contexts  
385 are determined by both temporal (block) context and the first stage stimulus  
386 (e.g. 16 contexts in the second stage of Experiment 1). All the equations of  
387 CRP, action selection and Q-learning remain the same. The Task-Set Model  
388 has 9 parameters:  $\alpha^1, \beta^1, \gamma^1, f^1, \alpha^2, \beta^2, \gamma^2, f^2, m$ .

#### 389 2.1.5.4. The Option Model.

390

391 The Option Model extends the task-set model to include multi-step de-  
392 cisions (options  $MO$ ). The first stage is identical to the Task-Set Model.  
393 However, in addition to just choosing an action, an  $MO$  is also activated. To

394 simplify credit assignment, we assumed that selecting an action in the first  
395 stage is equivalent to selecting an  $MO$  as a whole: for example, selecting  $A_1$   
396 for the circle activates  $MO_1$  (Fig. 1B).

397 The second stage is the same as the Task-Set Model, except that each  
398  $MO$  has an  $MO$ -specific probability table  $P_{MO}^2$ . In the Task-Set Model, the  
399 CRP in the second stage using  $P^2$  is independent of the first stage choices.  
400 In contrast, in the Option Model, the first stage choice determine which  $MO$   
401 is activated, which then determines which probability table,  $P_{MO}^2$ , to use  
402 for running the CRP in the second stage. This implementation captures the  
403 essence of options in the HRL framework, in that selection of  $MO$  in the first  
404 stage constrains the policy chosen until the end of the second stage (where  
405 the option terminates). The Option Model has the same 9 parameters as the  
406 Task-Set Model.

## 407 *2.2. Experiment 1 Results*

### 408 *2.2.1. Participants do not use flat RL*

409 Participants' performance improved over Blocks 1-6 (Fig. 2A) and within  
410 blocks (Supplementary Fig. S11). This improvement may reflect the usual  
411 process of learning the task observed in most cognitive experiments, as indi-  
412 cated by the improvement between Block 1 and 2 (paired t-test, first stage:  
413  $t(26) = 2.2, p = 0.03$ ; second stage:  $t(26) = 3.9, p = 0.0006$ ). However,  
414 it could also reflect participants' ability to create options at three different  
415 levels in Blocks 1 and 2, and to successfully reuse them in Blocks 3-6 to

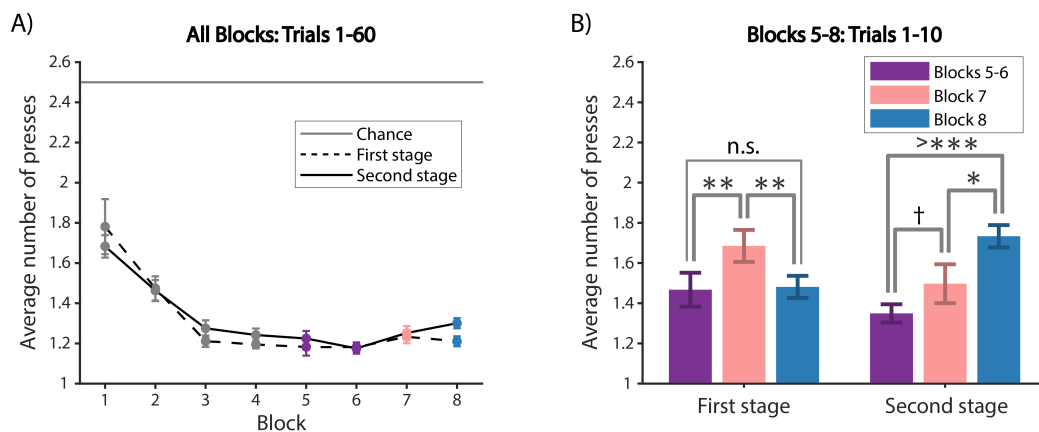

Figure 2: Experiment 1 general behavior. (A) Average number of key presses in the first and the second stages per block. Chance is 2.5, ceiling is 1 press. (B) Average number of key presses for the first 10 trials of Blocks 5-8 for the first (left) and second stages (right). We use n.s. to indicate  $p \geq 0.1$ ; † for  $p < 0.1$ ; \* for  $p < 0.05$ ; \*\* for  $p < 0.01$ ; \*\*\* for  $p < 0.001$ ; and >\*\*\* for  $p < 0.0001$ . We indicated all statistical significance with these notations from now on.

416 adapt to changes in contingencies more efficiently. Below, we present spe-  
 417 cific analyses to probe option creation in test blocks. We used participants’  
 418 performance averaged over Blocks 5 and 6 as a benchmark for comparing  
 419 against performance in test Blocks 7 and 8.

420 We probed potential option transfer effects over the first 10 trials for  
 421 each block (Fig. 2B), before behavior reached asymptote (Supplementary  
 422 Fig. S11). In the first stage, there was a main effect of block on number  
 423 of key presses (1-way repeated measure ANOVA,  $F(2, 48) = 6.9, p = 0.002$ ).  
 424 Specifically, participants pressed significantly more times in Block 7 than  
 425 Blocks 5-6 and Block 8 (paired t-test, Blocks 5-6:  $t(24) = 3.0, p = 0.006$ ;  
 426 Block 8:  $t(24) = 3.0, p = 0.006$ ). We also found no significant difference  
 427 between the performance of circle and square in Block 7 (9.1). These results

428 provide preliminary evidence for negative transfer of previously learned *HO*  
429 in Block 7: participants might attempt to reuse  $HO_1$  or  $HO_2$ , since either  
430 policy is successful for half the trials, but is incorrect and thus results in  
431 more key presses in the first stage for the other half of the trials. There  
432 was no significant difference between Block 8 and Blocks 5-6 (paired t-test,  
433  $t(24) = 0.25, p = 0.81$ ). This provides initial evidence for positive transfer of  
434  $HO_1$  in Block 8, since performance in the first stage of Block 8 was on par  
435 with Blocks 5-6.

436 In the second stage (Fig. 2B), there was also a main effect of block in  
437 number of key presses (1-way repeated measure ANOVA,  $F(2, 48) = 11, p <$   
438  $0.0001$ ). Specifically, participants pressed significantly more times in Block 8  
439 than Block 7 and Blocks 5-6 (paired t-test, Block 7:  $t(24) = 2.4, p = 0.025$ ;  
440 Blocks 5-6:  $t(24) = 5.8, p < 0.0001$ ). The difference between Block 7 and  
441 Blocks 5-6 was marginally significant (paired t-test,  $t(24) = 2.0, p = 0.06$ ).  
442 These results suggest participants positively transferred *MO* in the second  
443 stage of Block 7, where such generalization was helpful, since their perfor-  
444 mance was nearly not impaired compared to Blocks 5-6 where participants  
445 were able to reuse full *HO*. Furthermore, it suggests that they negatively  
446 transferred *MO* in the second stage of Block 8, where the first stage choice  
447 that respected the current *MO* was followed by a new *LO* for correct perfor-  
448 mance, and thus necessitated to create a new *MO*.

449 Behavioral results in both the first and second stages provide initial ev-  
450 idence for option learning and transfer at distinct levels, both positive –

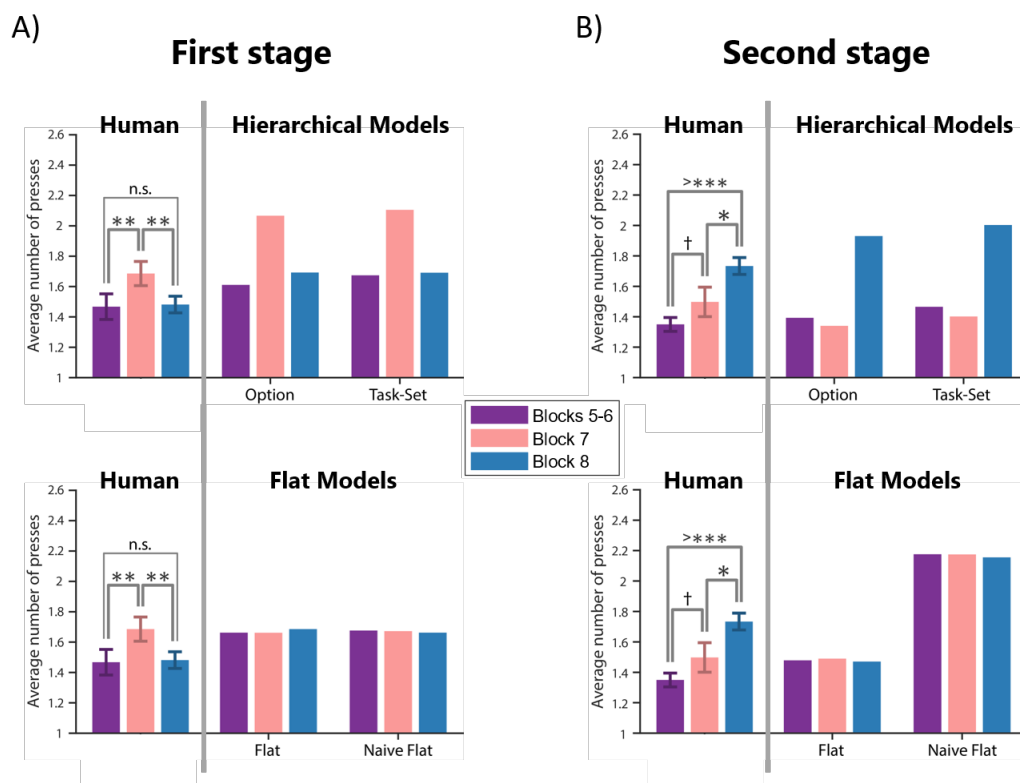

Figure 3: Experiment 1 transfer effects. Average number of first (A) and second (B) stage key presses in the first 10 trials of Block 5-8 for participants as well as model simulations. We ran 500 simulations of each hierarchical model (top) and flat model (bottom). See Table 1 for model parameters. Behavioral results show patterns of positive and negative transfer predicted by hierarchical, but not flat RL models, in both stages.

451 when previous policies can be helpfully reused – and negative – when they  
 452 impair learning. To further validate our hypothesis that participants learned  
 453 options, we compared the simulations of four models with human behavior  
 454 (Table 1).

455 Among the four models (Fig. 3), only the Option Model and the Task-  
 456 Set Model could account for the results. The Naive Flat Model could not  
 457 achieve reasonable performance in the second stage because it ignored the



458 non-Markovian aspect of the task - it was unable to learn two different sets  
459 of correct choices for a given second stage stimulus, because this required  
460 conditioning on the first stage stimulus (Fig. 1B). Thus, it serves to illustrate  
461 the limitations of classic RL, but is a straw man model in this task. The Flat  
462 Model achieved reasonable performance in both the first and second stages,  
463 being able to take into account the first stage in second stage decisions,  
464 but did not demonstrate any transfer effects. Thus, results so far replicate  
465 previous findings that participants create one-step policies or task-sets, that  
466 they can reuse in new contexts, leading to positive and negative transfer  
467 [9, 32, 66]. We now present new analyses to show that the findings extend  
468 to creating multi-step policies or options.

469 *2.2.2. Second stage choices reveal option transfer*

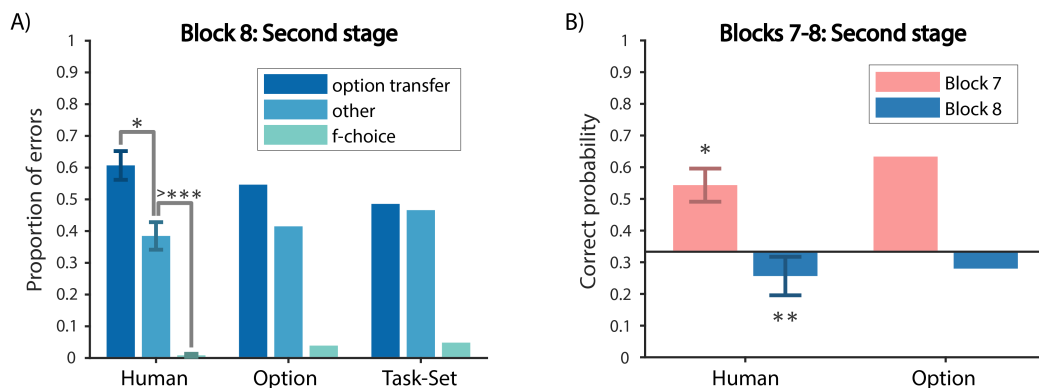

Figure 4: Experiment 1 second stage choices. (A) Error type analysis of the second stage in Block 8 for participants, the Option Model and the Task-Set Model. Participants made significantly more option transfer errors than other errors. This was predicted by the Option Model, but not by the Task-Set Model. (B) Probability of a correct first key press for the second stage of the first trial of each of the 4 branches in Blocks 7-8 reveals positive and negative transfer prior in first attempt (left), as predicted by the Option Model (right).

470 To strengthen our results, we further examined the specific errors that  
471 participants made as they can reveal the latent structure used to make deci-  
472 sions. To further disambiguate between the Option Model and the Task-Set  
473 Model, we categorized errors into meaningful choice types ([9]). We focused  
474 on the second stage choices for model comparison (Fig. 4), the part of the ex-  
475 periment designed so that temporally extended policies could have an impact  
476 on decision making.

477 We hypothesized that participants learned *MO*'s that paired the policies  
478 in the first and second stages. Therefore, positive transfer in the second  
479 stage of Block 7 and negative transfer in the second stage of Block 8 should  
480 be due to participants selecting the entire *MO* that was previously learned  
481 in response to a first stage stimulus, including the correct key press for the  
482 first level stimulus as well as the corresponding *LO* for the second level. We  
483 defined choice types based on this hypothesis. For example, for the second  
484 stage of Block 8, consider the diamond following the circle in Block 8 (Fig.  
485 1B):  $A_2$  is the correct action; an  $A_1$  error corresponds to the correct action  
486 in the first stage (“f-choice” type); an  $A_4$  error would be the correct action  
487 if selecting  $MO_1$  as a whole (“option transfer” type); an  $A_3$  error is labeled  
488 “other” type.

489 We computed the proportion of the 3 error types for the first 3 trials of  
490 each of the 4 branches in the second stage of Block 8 (Fig. 4A). There was  
491 a main effect of error type (1-way repeated measure ANOVA,  $F(2, 48) =$   
492  $44, p < 0.0001$ ). In particular, we found more “option transfer” errors than

493 the “other” errors (paired t-test,  $t(24) = 2.5, p = 0.02$ ), suggesting that  
494 participants selected previously learned *MO*’s as a whole at the beginning of  
495 the second stage of Block 8. The Option Model could reproduce this effect  
496 because the agent selects an entire option (*MO*) in the first stage: not only  
497 its immediate response to the first stage stimulus, but also its policy over  
498 *LO* choice in the second stage. The Task-Set Model could not reproduce  
499 this effect, because the first stage choice was limited to the first stage, and  
500 the second stage did not use any choice information from the first stage.  
501 Therefore, the error type profile in Block 8 could not be accounted for by  
502 transfer of one-step task-sets alone, ruling out the Task-Set Model.

503 There was also more “other” type than “f-choice” errors (paired t-test,  
504  $t(24) = 8.8, p < 0.0001$ ). There were few “f-choice” errors, likely due to meta-  
505 learning ([69]): participants observed that the correct action in the second  
506 stage was always different from the first stage (Fig. 1B). We included a  
507 mechanism in all models to capture this heuristic and quantitatively capture  
508 behavior better.

509 The same choice type definitions were not well-defined for the second stage  
510 of blocks other than Block 8. Therefore, we categorized errors differently in  
511 Blocks 1-7. For example, consider the diamond following the circle in Blocks  
512 1, 3, and 5 (Fig. 1B):  $A_4$  is the “correct” choice; an  $A_1$  error corresponds to  
513 the correct choice in the first stage (“f-choice” type); an  $A_2$  error corresponds  
514 to the correct action for the other second stage stimulus, triangle, in the same  
515 *LO*, thus we defined it to be the “sequence” type, because  $A_2$  followed the first

516 stage correct action  $A_1$  half of the time, as opposed to the “non-sequence”  
517 action  $A_3$ , which never happened after  $A_1$ . Aggregating the first 3 trials for  
518 each of the 4 branches in the second stage of Blocks 5-7 (Supplementary Fig.  
519 S6A), we did not find any significant difference in any of the 4 choice types  
520 between the second stage of Block 7 and that of Blocks 5-6 (paired t-test, all  
521 ( $t(24) \leq 1$ ,  $p$ 's  $> 0.30$ ). This indicates that the positive transfer in the second  
522 stage of Block 7 was not interfered by the negative transfer in the first stage  
523 of Block 7, further confirming that participants were selecting learned  $MO$ 's  
524 as a whole, but re-composing them together into a new  $HO$ . The Option  
525 Model is also able to quantitatively capture the similarity of the choice type  
526 profiles between Block 7 and Blocks 5-6 (Supplementary Fig. S6B).

527 *2.2.3. The first press in the second stage reveals theoretical benefit of options*

528 While the first several trials demonstrated transfer effects, the Option  
529 Model predicts immediate transfer effect on the first press in the second  
530 stage of a new block without any experience. Therefore, we computed the  
531 probability of a correct choice on the first press for the 4 branches in the  
532 second stage (Fig. 4B), and compared to chance ( $\frac{1}{3}$ , accounting for the  
533 meta-learning effect that the correct action in the second stage was always  
534 different from the first stage). The probability of a correct first key press in  
535 Block 7 and Blocks 5-6 was significantly above chance (sign test, Block 7:  
536  $p = 0.015$ ; Blocks 5-6:  $p < 0.0001$ ), without significant difference between  
537 the two (sign test,  $p = 0.26$ ). These positive transfer effects on the first press

538 supports our prediction that participants were using previously learned *MO*  
539 to guide exploration and thus speed up learning even without any experience  
540 in Blocks 5-7. Block 8 was significantly below chance (sign test,  $p = 0.004$ ),  
541 independently indicating, via negative transfer, exploration with previously  
542 learned *MO* in the very first trials. The Option Model was able to quanti-  
543 tatively reproduce these positive and negative transfer effects evident in the  
544 first press in the second stage, since the first stage choice can immediately  
545 help inform which *LO* to use in the second stage.

#### 546 2.2.4. First stage choices reveal transfer of policies over options

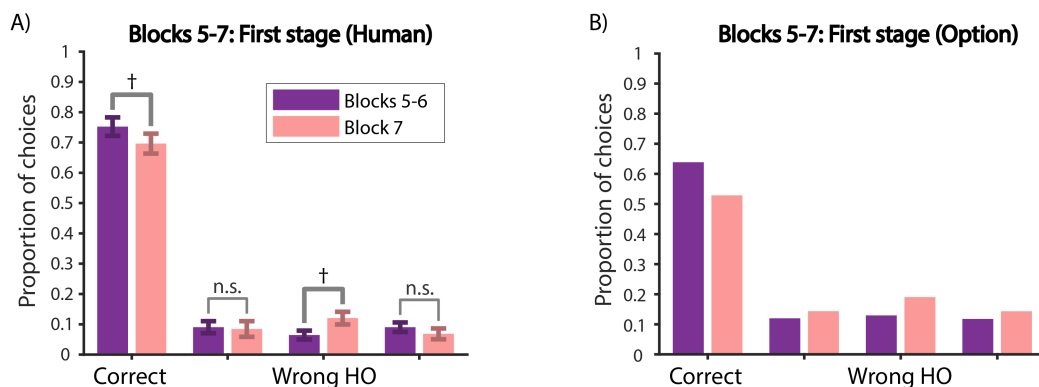

Figure 5: Experiment 1 first stage choices. Choice type analysis of the first stage in Blocks 5-7 for participants (A) and the Option Model (B). Participants made significantly more wrong *HO* errors in Block 7 than in Blocks 5-6, but no change for the other two error types. This suggests that participants were negatively transferring *HO* in the first stage of Block 7, as predicted by the Option Model.

547 To test whether participants learned *HO*'s in the first stage, we inves-  
548 tigated errors in the first stage. We hypothesized that the increase in key  
549 presses in the first stage of Block 7 (Fig. 2B) was due to selecting a previously  
550 learned but now wrong *HO* in the first stage, which would be characterized

551 by a specific error. We categorized first stage errors into 3 types (“wrong  
552 shape”, “wrong *HO*”, and “both wrong”), which we exemplify for the cir-  
553 cle in Blocks 1, 3, and 5 (Fig. 1B):  $A_1$  is the “correct” action; an  $A_2$  error  
554 corresponds to the correct action for the square in the same block (“wrong  
555 shape” type); an  $A_3$  error corresponds to the correct action for the circle in  
556 Blocks 2, 4, and 6 (“wrong *HO*” type); and  $A_4$  is the “both wrong” type.  
557 According to our hypothesis, we expected that the worse performance in  
558 the first stage of Block 7 (Fig. 3B) should be primarily due to the “wrong  
559 HO” errors. We found a main effect of choice type (2-way repeated measure  
560 ANOVA,  $F(3, 72) = 195, p < 0.0001$ ) and a significant interaction between  
561 block and choice type ( $F(3, 72) = 2.9, p = 0.04$ ). In particular, we found that  
562 in Block 7 (Fig. 5A), compared to Blocks 5-6, only the “wrong *HO*” error  
563 type marginally increased (paired t-test,  $t(24) = 1.9, p = 0.07$ ) in Block 7.  
564 The Option Model reproduced this choice type profile in the first stage (Fig.  
565 5B), by attempting to transfer previously learned *HO*, which would hurt  
566 performance in the first stage.

#### 567 2.2.5. Experiment 1 Mturk replicates option transfer in the second stage

568 While in-lab participants’ behavior showed promising evidence in favor  
569 of transferring multi-step options, we sought to replicate our results in a  
570 larger and more diverse population. Therefore, we ran a shorter version of  
571 Experiment 1 on Mturk (Fig. 6A, Supplementary Fig. S12). In the second  
572 stage, we replicated the main effect of block on the number of presses (1-

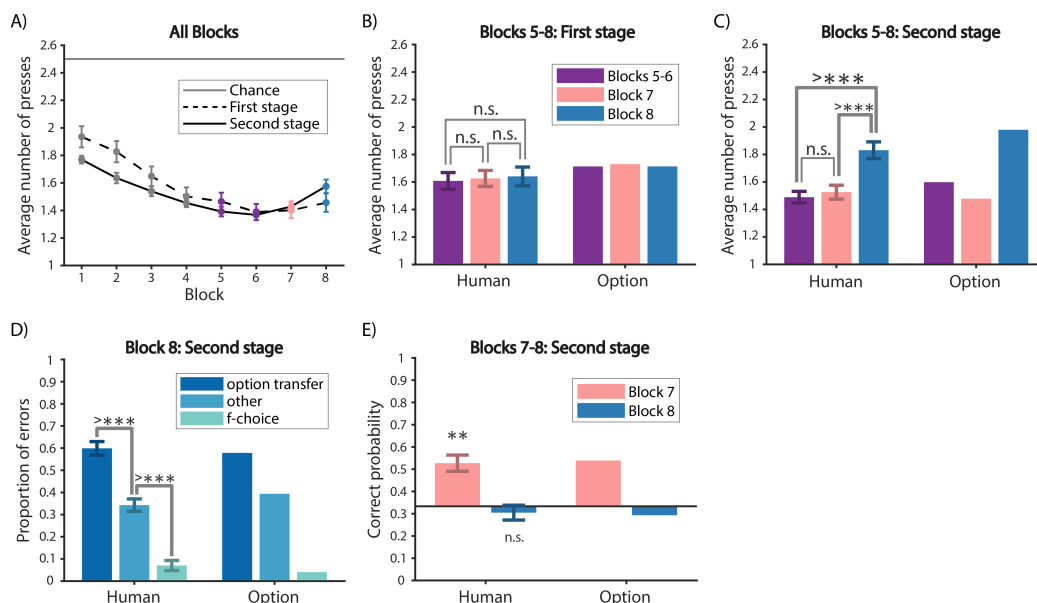

Figure 6: Experiment 1 Mturk results. (A) Average number of key presses in the first and the second stages per block. (B) Average number of key presses for the first 10 trials of Blocks 5-8 for the first stage for participants (left) and the Option Model (right). (C) Same as (B) for the second stage. (D) Error type analysis of the second stage in Block 8 for participants (left) and the Option Model (right). We replicated the same pattern as the in-lab population (Fig. 4A). (E) Probability of a correct first key press for the second stage of the first trial of each of the 4 branches in Blocks 7-8 for participants (left) and the Option Model (right).

573 way repeated measure ANOVA,  $F(2, 108) = 19, p < 0.0001$ ). Specifically,  
 574 the average number of key presses (Fig. 6C) in the first 10 trials of Block 7  
 575 was not significantly different from that of Blocks 5-6 (paired t-test,  $t(54) =$   
 576  $0.72, p = 0.47$ ). Participants pressed significantly more times in Block 8  
 577 compared to Block 7 and Blocks 5-6 (paired t-test, Block 7:  $t(54) = 4.5, p <$   
 578  $0.0001$ ; Blocks 5-6:  $t(54) = 5.3, p < 0.0001$ ), replicating results from in-lab  
 579 participants (Fig. 2B).

580 In the second stage of Block 8 (Fig. 6D), there was a main effect of error

581 type (1-way repeated measure ANOVA,  $F(2, 108) = 62, p < 0.0001$ ). The  
582 “option transfer” errors were significantly more frequent than the “other”  
583 type errors (paired t-test,  $t(54) = 4.7, p < 0.0001$ ), and the “other” type was  
584 significantly more frequent than the “f-choice” type (paired t-test,  $t(54) =$   
585  $6.7, p < 0.0001$ ). This also replicates the error type profile of in-lab partici-  
586 pants.

587 For the probability of correct choice in the first press (Fig. 6E), we also  
588 found participants were performing significantly above chance in the second  
589 stage of Blocks 3-4, Blocks 5-6 and Block 7 (sign test, Blocks 3-4:  $p = 0.001$ ;  
590 Blocks 5-6:  $p = 0.003$ ; Block 7:  $p = 0.001$ ), but not significantly different  
591 from chance in Block 8 (sign test,  $p = 0.18$ ). There was also no significant  
592 difference between Block 7 and Blocks 5-6 (sign test,  $p = 1$ ). This supported  
593 the previous finding that participants used temporally extended *MOs* to  
594 explore in a new context.

595 We did not replicate the negative transfer in the first stage of Block  
596 7 (Fig. 6B) shown in in-lab participants (Fig. 2B). There was no main  
597 effect of block on the number of presses (1-way repeated measure ANOVA,  
598  $F(2, 108) = 0.19, p = 0.83$ ). Mturk participants did not press significantly  
599 more times in the first stage of Block 7 than Block 8 or Blocks 5-6 (paired  
600 t-test, Block 7:  $t(54) = 0.30, p = 0.77$ ; Blocks 5-6:  $t(54) = 0.32, p = 0.75$ ).  
601 This is potentially due to the lack of motivation among Mturk participants  
602 to exploit structure in the first stage, since participants did not receive points  
603 for being correct in the first stage. On the other hand, participants received



604 points for choices in the second stage, which, as indicated by the Mturk  
605 experiment instruction, would impact their bonus. This might explain why  
606 the transfer effects in the first stage did not replicate, but the second stage  
607 transfer did. Note that in this case, the absence of transfer allowed the Mturk  
608 participants to make fewer errors in Block 7 than they might otherwise,  
609 highlighting the fact that engaging in a cognitive task and building and using  
610 structure is not always beneficial.

611 The option model was able to account for Experiment 1 Mturk data,  
612 despite the lack of transfer in the first stage, by assuming either a faster  
613 forgetting of *HOs* (higher  $f^1$ ) or a lower prior for reusing them (higher  $\gamma^1$ )  
614 (Table 1). Indeed, simulations reproduced the lack of transfer in the first  
615 stage (Fig. 6B), and also captured all option transfer effects demonstrated  
616 by Mturk participants in the second stage (Fig. 6C-E).

617 We conclude that, in the Mturk sample, similar to the in-lab sample, we  
618 successfully replicated the main option transfer effects in the second stage  
619 due to selecting a temporally extended policy *MO* as a whole. This is re-  
620 flected by number of presses, proportion of error types in Block 8, and the  
621 probability of correct choice in the first press (Fig. 6C-E). While we did  
622 not replicate transfer of high level-options (task-sets of options), this could  
623 be accommodated by the model, and understood as a lack of motivation at  
624 learning the highest level of hierarchy *HO*.

625 **3. Experiment 2**

626 Experiment 2 was administered to UC Berkeley undergraduates in ex-  
 627 change for course credit. 31 (21 females; age: mean = 20.2, sd = 1.8, min =  
 628 18.3, max = 26.3) UC Berkeley undergraduates participated in Experiment  
 629 2. 4 participants in Experiment 2 were excluded due to incomplete data or  
 630 below chance performance, resulting in 26 participants for data analysis.

631 *3.1. Experiment 2 Protocol*

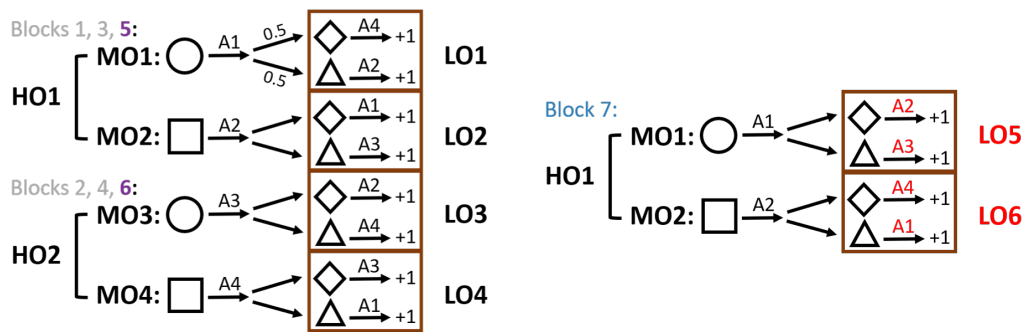

Figure 7: Experiment 2 protocol. To eliminate potential interference of Block 7 on Block 8 in Experiment 1, Block 7 of Experiment 1 was removed in Experiment 2. Therefore, Block 7 in Experiment 2 was identical to Block 8 in Experiment 1.

632 Experiment 1's Block 8 comes after a first testing block that includes re-  
 633 composing of previous options, which could interfere with our interpretation  
 634 of positive and negative transfer results in Block 8, for example by making  
 635 participants aware of the potential for structure transfer. In Experiment 2,  
 636 we removed Block 7 of Experiment 1 to eliminate this potential interference  
 637 (Fig. 7). Therefore, Block 7 in Experiment 2 was identical to Block 8 in  
 638 Experiment 1. In addition, to limit experiment length and loss of motivation

639 at asymptote in each block, we decreased the length of Blocks 3-7 to 32 trials  
 640 each, with each first stage stimulus leading to each second stage stimulus 8  
 641 times. All other aspects were identical to Experiment 1.

642 *3.2. Experiment 2 Results*

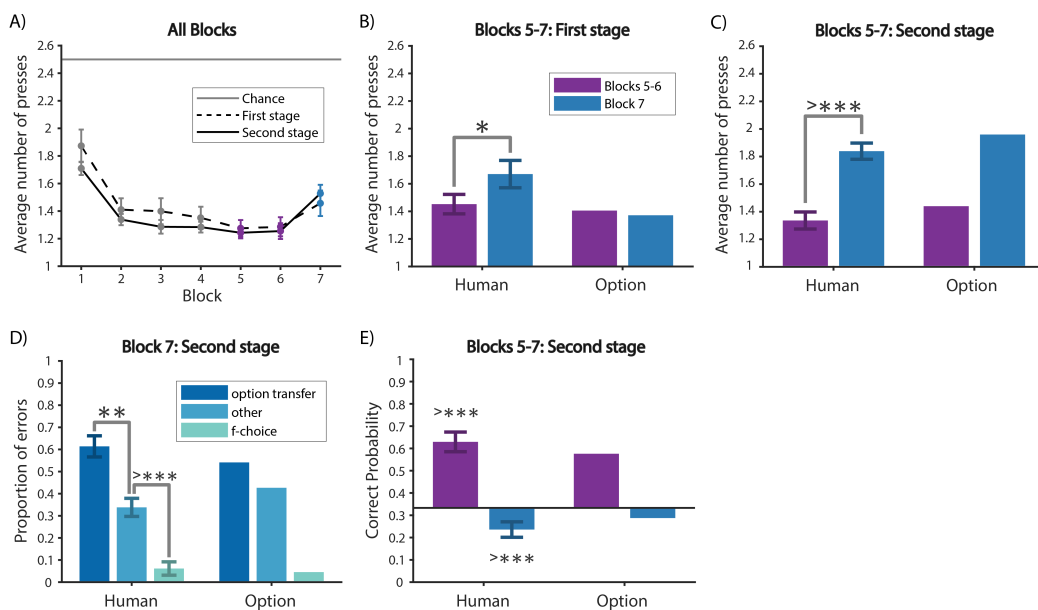

Figure 8: Experiment 2 results. (A) Average number of key presses in the first and the second stages per block. (B, C) Average number of key presses for the first 10 trials of Blocks 5-7 for the first (B) and second (C) stage for participants (left) and the Option Model (right). (D) Error type analysis of the second stage in Block 7 for participants (left) and the Option Model (right). We replicated the same pattern as in Block 8 of Experiment 1 (Fig. 4A, Fig. 6D). (E) Probability of a correct first key press for the second stage of the first trial of each of the 4 branches in Blocks 5-7 for participants (left) and the Option Model (right).

643 *3.2.1. Second stage choices replicate option transfer*

644 Participants were able to learn the correct actions in both the first and  
 645 second stages and their performance improved over Blocks 1-6, (Fig. 8A).

646 The within-block learning curves also showed that participants performance  
647 improved and then reached asymptote as they progressed within a block  
648 (Supplementary Fig. S13).

649 We replicated the negative transfer effects in the second stage of Ex-  
650 periment 1 (Fig. 2B) both in terms of number of presses (Fig. 8C) and  
651 error types in Block 7 (Fig. 8D). Participants pressed significantly more  
652 times in the second stage of Block 7 compared to Blocks 5-6 (paired t-test,  
653  $t(25) = 6.4, p < 0.0001$ ). In Block 7 specifically, there was a main effect  
654 of error type (1-way repeated measure ANOVA,  $F(2, 50) = 30, p < 0.0001$ ).  
655 The proportion of the error type “option transfer” was significantly higher  
656 than the error type “other” (paired t-test,  $t(25) = 3.2, p = 0.004$ ).

657 We also observed transfer effects on the first press in the second stage  
658 (Fig. 8E). We found that the probability of a correct choice was significantly  
659 above chance in Blocks 3-4 and Blocks 5-6 (sign test, Blocks 3-4:  $p = 0.0094$ ;  
660 Blocs 5-6:  $p < 0.0001$ ), and significantly below chance in Block 7 (sign  
661 test,  $p < 0.0001$ ). This replicates results in Blocks 3-6 and 8 in Experiment  
662 1 (Fig. 4B). The Option Model could quantitatively reproduce all these  
663 transfer effects (Fig. 8B-D).

### 664 *3.2.2. Second stage choices in Block 7 reveal interaction between meta-learning* 665 *and option transfer*

666 Because there was no Block 7 from Experiment 1, we had a less interfered  
667 test of negative transfer in the second stage of Block 7 of Experiment 2.

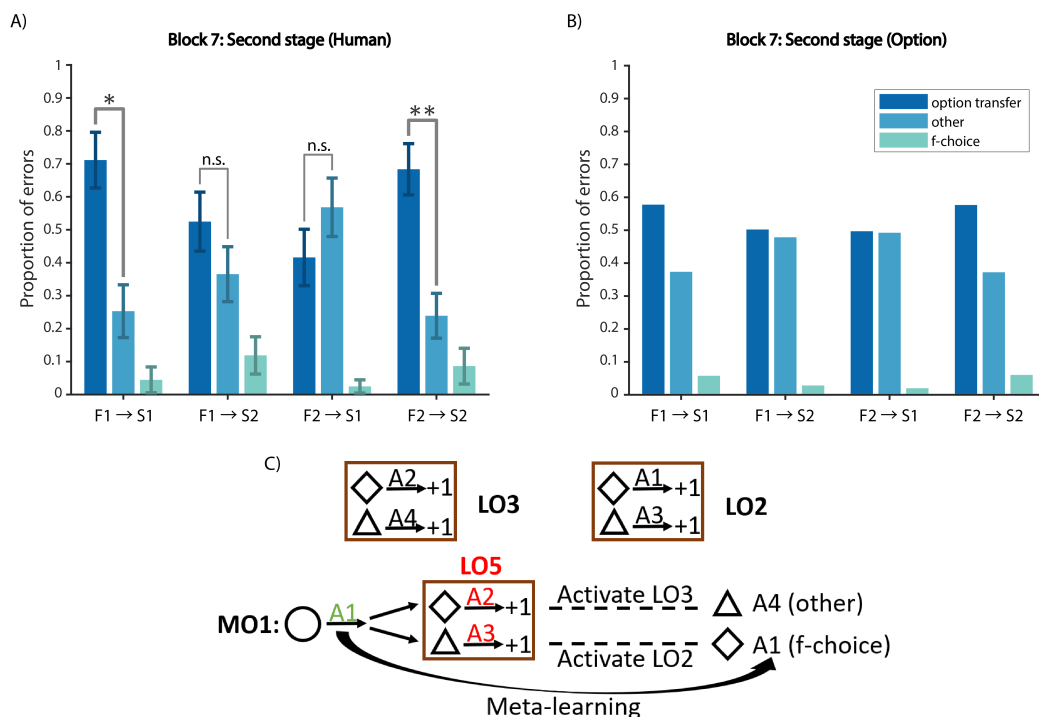

Figure 9: Experiment 2 second stage choice shows interaction between option transfer and meta learning. Error type analysis for each of the 4 branches in the second stage of Block 8 for participants (A) and the Option Model (B). The option transfer error was more than other error only for  $F_1 \rightarrow S_1$  and  $F_2 \rightarrow S_2$ , which was predicted by the Option Model. (C) Example schematic for the interaction: learning  $A_2$  for the diamond activates  $LO_3$ ; learning  $A_3$  for the triangle activates  $LO_2$ ; meta-learning only suppresses  $LO_2$  but not  $LO_3$ .

668 Therefore, we further broke down the second stage choice types for each of the  
 669 4 branches in the second stage of Block 7 in Experiment 2 (Fig. 9A). Consider  
 670 (Fig. 1B) the two first stage stimuli as  $F_1$  (circle) and  $F_2$  (square), and the  
 671 two second stage stimuli as  $S_1$  (diamond) and  $S_2$  (triangle). We found a main  
 672 effect of error type on proportion of error types and a marginally significant  
 673 interaction between branch and error type (2-way repeated measure ANOVA,  
 674 error type:  $F(2, 36) = 20, p < 0.0001$ ; interaction:  $F(6, 108) = 2.1, p =$

675 0.055). Specifically, we found the error type profile in Fig. 8C was mainly  
676 contributed by  $F_1 \rightarrow S_1$ , i.e. circle in the first stage followed by diamond  
677 in the second stage, and  $F_2 \rightarrow S_2$  (paired t-test,  $F_1 \rightarrow S_1$ :  $t(23) = 2.7, p =$   
678  $0.013$ ;  $F_2 \rightarrow S_2$ :  $t(23) = 3.1, p = 0.005$ ). On the other hand, there was no  
679 significant difference between the “option transfer” and “other” error types  
680 for  $F_1 \rightarrow S_2$  and  $F_2 \rightarrow S_1$  (paired t-test,  $F_1 \rightarrow S_2$ :  $t(22) = 0.9, p = 0.38$ ;  
681  $F_2 \rightarrow S_1$ :  $t(22) = 0.81, p = 0.43$ ). It is striking that this highly non-intuitive  
682 result is perfectly predicted by the Option Model (Fig. 9B).

683 The Option Model offers an explanation as the interaction between option  
684 transfer and meta-learning (Fig. 9C). Meta-learning discourages participants  
685 from selecting second-stage actions that repeat the correct first-stage action,  
686 and as such, discourage them from sampling some, but not other  $LO$ s (e.g.  
687  $LO_2$  in the example of Fig. 9C). This interference in the exploration of poten-  
688 tial  $LO$ 's leads to some transfer errors to be more likely, in an asymmetrical  
689 way.

### 690 3.2.3. Influence of the second stage on the first stage

691 For the first stage choices (Fig. 8B), we found that participants pressed  
692 significantly more times in the first 10 trials of Block 7 compared to Blocks  
693 5-6 (paired t-test,  $t(25) = 2.4, p = 0.024$ ). This effect was not found in Ex-  
694 periment 1 between Block 8 and Blocks 5-6 (Fig. 2B), and was not predicted  
695 by the model.

696 One potential explanation for this surprising result is that the error signals

697 in the second stage propagated back to the first stage. Specifically, the errors  
698 participants made by selecting the wrong *LO* in the second stage are credited  
699 to the chosen *LO*'s policy, but participants might also credit these errors to  
700 using the wrong *HO* in the first stage. Going back to our example, if your  
701 meal is not tasty, it might not be because you roasted the potatoes instead  
702 of boiling them, but it might be because you needed vegetables instead of  
703 potatoes in the first place. To test this explanation, we further probed choice  
704 types in the first stage of Experiment 2 (Supplementary Fig. S7). Indeed,  
705 we found significantly more “wrong *HO*” errors in Block 7, compared to  
706 Blocks 5-6 (paired t-test,  $p = 0.045$ ). Therefore, the increase in number of  
707 key presses in the first stage of Block 7 was mainly contributed by more  
708 “wrong *HO*” errors, indicating that participants explored another high level  
709 option (cooking vegetables). The same effect was not seen in the first stage  
710 of Experiment 1 between Block 8 and Blocks 5-6 (Fig. 2B), potentially due  
711 to the interference of Block 7 in Experiment 1.

712 The Option Model could not capture this effect, since the selection of  
713 *HO* was only affected by learning in the first stage (Sec. 2.1.5), as a way of  
714 simplifying credit assignment (see Sec. 6 for a more detailed discussion on  
715 credit assignment).

#### 716 4. Experiment 3

717 Experiment 3 was administered to UC Berkeley undergraduates in ex-  
718 change for course credit. 35 (22 females; age: mean = 20.5, sd = 2.5, min

719 = 18, max = 30) UC Berkeley undergraduates participated in Experiment  
 720 3. 10 participants in Experiment 3 were excluded due to incomplete data or  
 721 below chance performance, resulting in 25 participants for data analysis.

722 An additional 65 (37 female; see age range distribution in Table 3) Mturk  
 723 participants finished the experiment. 34 participants were further excluded  
 724 due to poor performance, resulting in 31 participants for data analysis (see  
 725 Sec. 2.1.4).

726 *4.1. Experiment 3 in-lab Protocol*

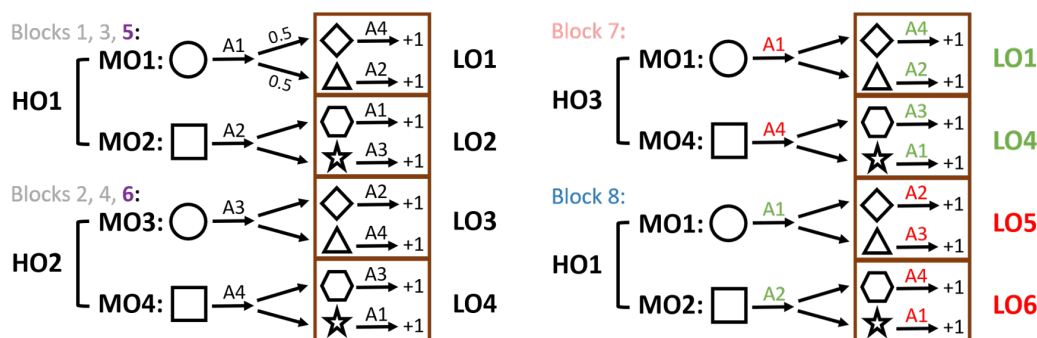

Figure 10: Experiment 3 protocol. The second stage stimuli following each first stage stimuli were different: diamond and triangle followed circle; hexagon and star followed square. All state-action assignments remained the same as Experiment 1. This manipulation allowed us to test whether participants would naturally learn and transfer options in the second stage even when they could simply learn the correct key for each of the 4 second stage stimuli individually, rather than needing to take into account first stage information.

727 In Experiment 1, to perform well in the second stage, participants had to  
 728 learn option-specific policies, due to the non-Markovian nature of the task  
 729 (the correct action for the same second stage stimulus was dependent on  
 730 the first stage stimulus). In Experiment 3, we removed this non-Markovian



731 feature of the protocol and tested whether the removal would reduce or elim-  
732 inate option transfer. Based on previous research on task-sets showing that  
733 participants build structure when it is not needed ([32, 70]), we predicted  
734 that participants might still show some evidence of transfer. However, we  
735 predicted that any evidence of transfer would be weaker than in previous  
736 experiments.

737 In Experiment 3, the second stage stimuli following the two first stage  
738 stimuli were different (Fig. 10). For example, diamond and triangle fol-  
739 lowed circle, whereas star and hexagon followed square. This eliminated the  
740 key non-Markovian feature from Experiment 1, since participants could sim-  
741 ply learn the correct key for each of the 4 second stage stimuli individually  
742 without learning option-specific policies. Blocks 1 and 2 had 60 trials; we  
743 shortened Blocks 3 to 8 to 32 trials for the same reason as in Experiment 2.  
744 All other aspects of the protocol were identical to Experiment 1.

#### 745 *4.2. Experiment 3 Mturk Protocol*

746 In the Mturk version, Blocks 1 and 2 had a minimum of 32 and a max-  
747 imum of 60 trials, but participants moved on to the next block as soon as  
748 they reached a criterion of less than 1.5 key presses per second stage trial  
749 in the last 10 trials (the 31 Mturk participants included for data analysis on  
750 average used 36 (SD = 7, median = 32, min = 32, max = 60) trials in Block  
751 1 and 35 (SD = 4, median = 32, min = 32, max = 59) trials in Block 2).  
752 Blocks 3 to 8 all had 32 trials each. Experiment 3 MTurk was thus perfectly

753 comparable to Experiment 1 MTurk, as such, we focus first on MTurk re-  
 754 sults, since the same comparison could not be drawn between Experiments  
 755 1 and 3 for in-lab participants.

756 *4.3. Experiment 3 Results*

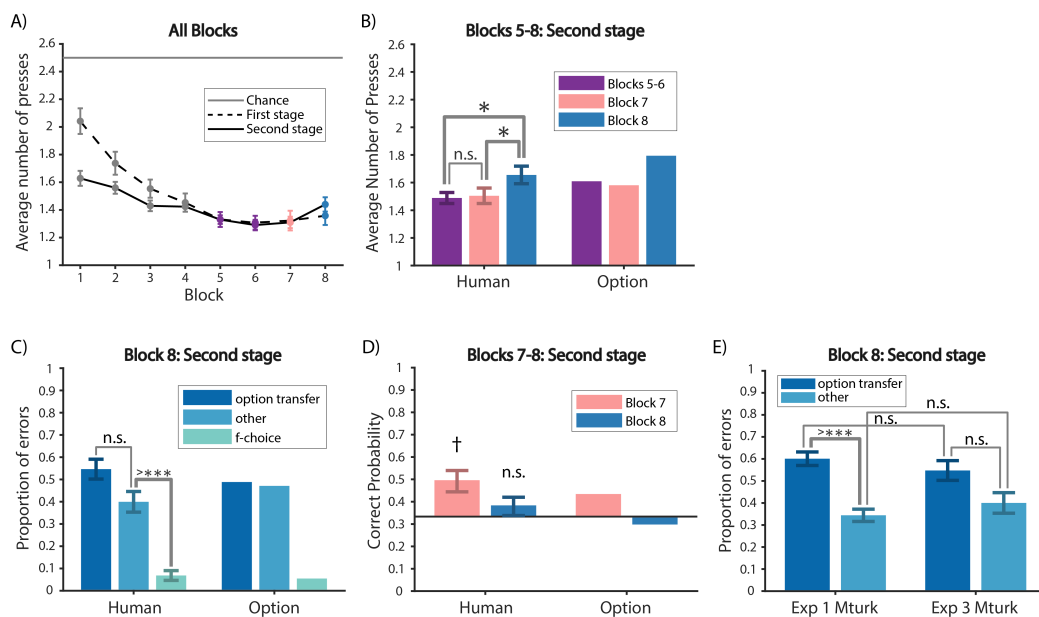

Figure 11: Experiment 3 Mturk results. (A) Average number of key presses in the first and the second stages per block. (B) Average number of key presses for the first 10 trials of Blocks 5-8 for the second stage for participants (left) and the Option Model (right). (C) Error type analysis of the second stage in Block 8 for participants (left) and the Option Model (right). The proportion of option transfer error was not significantly different from other error, different from Experiment 1 and Experiment 2, suggesting reduced option transfer. (D) Probability of a correct first key press for the second stage of the first trial of each of the 4 branches in Blocks 7-8 for participants (left) and the Option Model (right). (E) Comparison of Experiment 1 Mturk and Experiment 3 Mturk participants in terms of error types in the second stage of Block 8: There was no significant effect of experimental condition.

757 *4.3.1. Mturk participants show reduced option transfer*

758 Mturk participants were able to learn the correct actions in both the  
759 first and second stages, and their performance improved over Blocks 1-6,  
760 (Fig. 11A). The within-block learning curves also showed that participants  
761 performance improved and then reached asymptote as they progressed within  
762 a block (Supplementary Fig. S14).

763 We first analyzed the average number of key presses in the first 10 trials  
764 of each block and stage. For the first stage (Supplementary Fig. S8A), we  
765 found no effect of block on number of presses across Blocks 5-8 ( $F(2, 60) =$   
766  $0.13, p = 0.88$ ), as in Experiment 1 MTurk. For the critical second stage  
767 (Fig. 11B), there was a main effect of Block ( $F(2, 60) = 3.3, p = 0.043$ ).  
768 Specifically, there was no significant difference between Block 7 and Blocks  
769 5-6 (paired t-test,  $t(30) = 0.25, p = 0.81$ ). Participants pressed significantly  
770 more times in Block 8 than in Block 7 and Blocks 5-6 (paired t-test, Block  
771 7:  $t(30) = 2.1, p = 0.048$ ; Blocks 5-6:  $t(30) = 2.2, p = 0.036$ ).

772 The negative transfer effect observed in the first stage of Block 7 in Ex-  
773 periment 1 (Fig. 3A) was not present here in Experiment 3 (Fig. 11). In  
774 addition to the fact that the first stage was never explicitly rewarded, as in  
775 Experiment 1, participants in Experiment 3 were even less motivated to ex-  
776 ploit structure in the first stage. This is because the first stage in Experiment  
777 3 was not necessary for resolving the second stage actions (Fig. 10), while  
778 the non-Markovian aspect of Experiment 1 (Fig. 1B) forced participants to  
779 incorporate first stage information to resolve the correct choice for the second

780 stage.

781 We calculated the proportion of error types in the second stage of Block  
782 8 (Fig. 11C). Unlike in Experiment 1, we did not observe significantly more  
783 “option transfer” error than “other” error (paired t-test,  $t(30) = 1.6, p =$   
784  $0.11$ ). This choice type profile, compared to that in Experiment 1 and Ex-  
785 periment 2 (Fig. 4A, Fig. 6D, Fig. 8D) suggests reduced option transfer in  
786 the second stage.

787 We also calculated the probability of a correct second stage first press for  
788 each of the 4 branches in the second stage (Fig. 11D). The probability was  
789 significantly above chance in Blocks 3-4 and Blocks 5-6 (sign test, Blocks 3-4:  
790  $p = 0.0002$ ; Blocks 5-6:  $p < 0.0001$ ). It was marginally above chance in Block  
791 7 (sign test,  $p = 0.07$ ) and not significantly different from chance in Block 8  
792 (sign test,  $p = 1$ ). Compared to the results in Experiment 1 (Fig. 4B, Fig.  
793 6E). These results suggest participants were still taking advantage of previ-  
794 ously learned options to speed up learning at the beginning of each block,  
795 but potentially to a lesser extent compared to Experiment 1 and Experiment  
796 2.

797 To formally quantify the effect of the experimental manipulation, we com-  
798 pared Experiment 1 and Experiment 3 for Mturk participants. In particular,  
799 we compared the proportion of “option transfer” and “other” error types in  
800 the second stage of Block 8 between the two experiments (Fig. 11E). We  
801 found a main effect of error type (2-way mixed ANOVA,  $F(2, 168) = 76, p <$   
802  $0.0001$ ), but there was no interaction between experiment and error type (2-

803 way mixed ANOVA,  $F(2, 168) = 0.89, p = 0.41$ ). In particular, the propor-  
804 tion of “option transfer” error type was not significantly higher in Experiment  
805 1, compared to that in Experiment 3 (unpaired t-test,  $t(84) = 1, p = 0.32$ ).  
806 This further shows that while there might be reduced option transfer in the  
807 second stage of Block 8 based on the error type profile (Fig. 11C), we could  
808 not rule out option transfer in Experiment 3.

809 The Option Model could capture a reduction in option transfer (Fig.  
810 11B-D), with an increase in the second stage clustering coefficient  $\gamma^2$ , which  
811 controls how likely the model is to select a new blank policy compared to  
812 previously learned ones in the second stage, as well as the forgetting param-  
813 eter in the second stage,  $f^2$ , which increases the speed at which the model  
814 forgets previously learned  $LO$  (Table 1).

#### 815 4.3.2. In-lab participants replicate results from Mturk participants

816 In-lab participants replicated all aforementioned trends shown in Mturk  
817 participants (Supplementary Fig. S9). In particular, there was a main effect  
818 of block on number of choices in the second stage ( $F(2, 46) = 7.2, p = 0.002$ ).  
819 In-lab participants also pressed significantly more times in the second stage  
820 of Block 8 than Blocks 5-6 (paired t-test,  $t(23) = 3.6, p = 0.0017$ ), and  
821 marginally more than Block 7 (paired t-test,  $t(23) = 1.9, p = 0.067$ ). More-  
822 over, similar to Mturk participants, the proportion of “option transfer” error  
823 type was not significantly different from “other” error type (paired t-test,  
824  $t(23) = 0.8, p = 0.43$ ). These results replicated reduced option transfer in

825 the second stage in a separate in-lab population. Note that we could not  
 826 do the same comparison between Experiment 1 and Experiment 3 for in-lab  
 827 participants, because the number of trials per block for Experiment 1 and  
 828 Experiment 3 was different in-lab.

## 829 5. Experiment 4

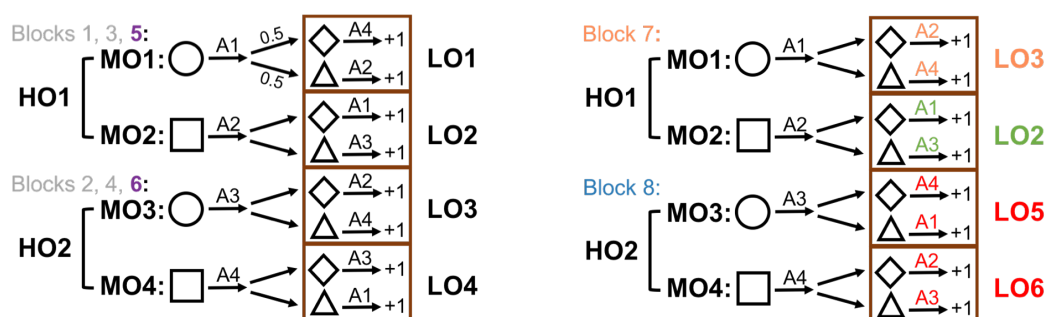

Figure 12: Experiment 4 protocol. In Experiment 4, we tested participants' ability to recompose *LO* policies within *MO* policies. Blocks 1-6 were identical to Experiment 1. In Block 7, green indicates positions of potential positive transfer: *MO*<sub>2</sub> followed by *LO*<sub>2</sub> was learned in Blocks 1, 3, 5. Orange indicates positions of option composition: although *MO*<sub>1</sub> previously included *LO*<sub>1</sub> for second stage stimuli, it was modified to *LO*<sub>3</sub> in Block 7. In Block 8, red indicates positions of negative transfer: *LO*<sub>5</sub> and *LO*<sub>6</sub> were completely novel to participants. Blocks were color coded for later analysis: Blocks 1-4 gray; Blocks 5-6 purple; Block 7 orange; Block 8 blue.

830 Experiment 4 was administered to UC Berkeley undergraduates in ex-  
 831 change for course credit. 31 (23 females; age: mean = 20.2, sd = 1.4, min  
 832 = 18, max = 23) UC Berkeley undergraduates participated in Experiment  
 833 4. 12 participants were excluded due to incomplete data or below chance  
 834 performance, resulting in 19 participants for data analysis.

835 An additional 110 (50 females; see age range distribution in Table 3)  
 836 Mturk participants finished the experiment. 49 participants were excluded

837 due to poor performance, resulting in 61 participants for data analysis (see  
838 Sec. 2.1.4).

### 839 5.1. Experiment 4 in-lab Protocol

840 Experiment 4 (Fig. 12) was designed to test whether participants were  
841 able to compose options learned at different levels. Specifically, the protocol  
842 was identical to Experiment 1, except for Blocks 7 and 8. Block 8 in Exper-  
843 iment 4 was similar to Block 8 in Experiment 1, introducing two new  $LO$ 's  
844 ( $LO_{new}$ ) at the second stage as a benchmark for pure negative transfer.

845 The main difference between Experiment 4 and Experiment 1 was Block  
846 7. In Block 7, one of the first stage stimuli (e.g. square) elicited the same  
847 extended policy  $MO_2$  ( $A_2$  followed by  $LO_2$  in the second stage), allowing  
848 positive  $MO$  transfer (“match” condition  $LO_{match}$ ). In contrast, the other  
849 first stage stimulus (e.g. circle) elicited a new policy recomposed of old  
850 subpolicies: participants needed to combine what they learned in the first  
851 stage of  $MO_1$  in Blocks 1, 3, and 5 ( $A_1$ ) (allowing for first stage transfer of  
852  $HO_1$ ), and the second stage of Blocks 2, 4, and 6 ( $LO_3$ ; “mismatch” condition  
853  $LO_{mismatch}$ ). Extending the food analogy, in Blocks 1, 3, 5, participants  
854 learned to make potatoes ( $MO_1$ ) by cutting potatoes (the first stage) and  
855 then roasting ( $LO_1$ ). In Block 7, participants also needed to cut potatoes,  
856 but then steam them ( $LO_3$ ), which was already learned as part of  $MO_3$  (make  
857 vegetables) in Blocks 2, 4, 6. All blocks had 60 trials each.

858 *5.1.1. Experiment 4 Mturk Protocol*

859 The Mturk version was shortened for online workers. Blocks 1 and 2 had  
860 a minimum of 32 and a maximum of 60 trials, but participants moved on  
861 to the next block as soon as they reached a criterion of less than 1.5 key  
862 presses per second stage trial in the last 10 trials (the 61 Mturk participants  
863 included for data analysis on average used 46 (SD = 11, median = 42, min  
864 = 32, max = 60) trials in Block 1 and 43 (SD = 11, median = 38, min = 32,  
865 max = 60) trials in Block 2). All other blocks had 32 trials each.

866 *5.2. Experiment 4 Results*

867 *5.2.1. Mismatch impacted performance of in-lab participants*

868 Participants' performance improved over Blocks 1-6 (Supplementary Fig.  
869 S10A) and within each block (Supplementary Fig. S16). First stage perfor-  
870 mance was similar in Blocks 5-8, as expected by the model (Supplementary  
871 Fig. S8). To test more specifically whether participants were able to com-  
872 pose options, we focused on comparing the second stage behavior for old  
873 LOs ( $LO_{match}$  and  $LO_{mismatch}$ ) and the average of  $LO_5$  and  $LO_6$  ( $LO_{new}$ ) in  
874 Blocks 7-8. The Option Model predicted that performance for  $LO_{match}$  in  
875 Block 7 should be the best due to positive transfer, since participants should  
876 have learned the extended  $MO_2$  policy whereby  $LO_2$  followed  $A_2$  in Blocks 1,  
877 3, and 5 (Fig. 12).  $LO_{new}$  should be the worst due to negative transfer, with  
878 all 4 stimulus-action assignments in the second stage novel. Performance for  
879  $LO_{mismatch}$  in Block 7 should fall in between (as observed in the number of



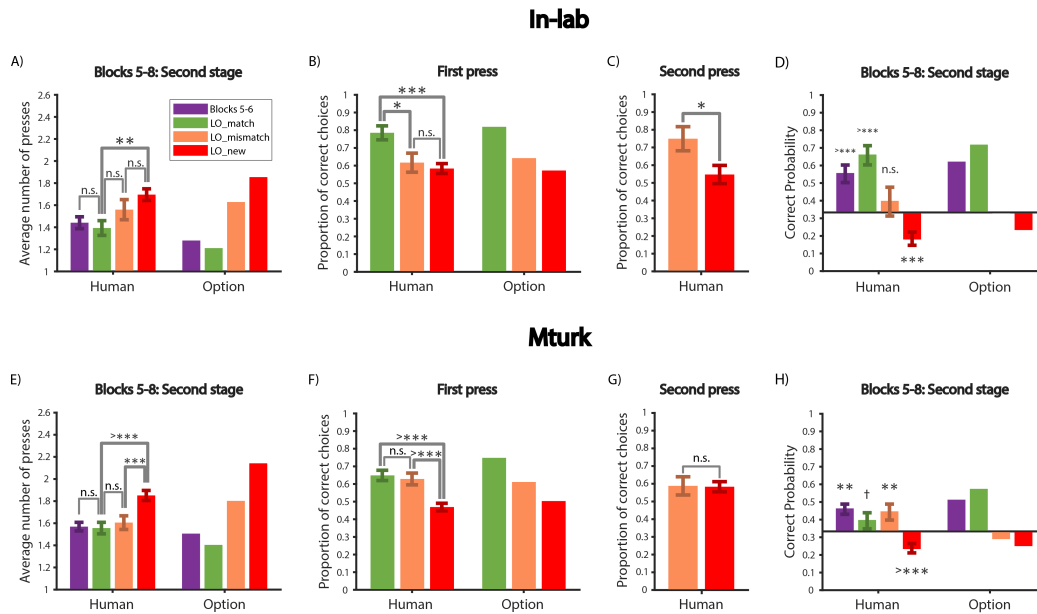

Figure 13: Experiment 4 results show re-composition of options. (A)-(D) In-lab participants. (A) Average number of key presses for the first 3 trials for each of the 4 branches in the second stage of Blocks 5-8 for participants (left) and the Option Model (right). Block 7 was split into  $LO_{match}$  and  $LO_{mismatch}$ ; Block 8 corresponded to  $LO_{new}$ . (B) Proportion of correct choices on the first press of trials 1-3 for each of the 4 branches in the second stage for  $LO_{match}$ ,  $LO_{mismatch}$  and  $LO_{new}$  for participants (left) and the Option Model (right). (C) Proportion of correct choices on the second press (for trials 1-3 for each of the 4 branches with an incorrect first key press) for the mismatch (left) and the new (right) condition. (D) Probability of a correct first key press for the second stage of the first trial of each of the 4 branches in Blocks 5-8 for participants (left) and the Option Model (right). (E)-(H) Same as (A)-(D) for Mturk participants.

880 key pressed, Fig. 13A). While there should be negative transfer, as  $MO_1$   
 881 was usually followed by  $LO_1$ ,  $LO_3$  had been previously learned, so its per-  
 882 formance should still surpass the performance in the second stage of Block  
 883 8, where  $LO_5$  and  $LO_6$  were completely novel to the participants. Therefore,  
 884 we predicted  $LO_{match} > LO_{mismatch} > LO_{new}$  in terms of performance.

885 In the second stage (Fig. 13A), there was a main effect of block on

886 number of presses (1-way repeated measure ANOVA,  $F(2, 36) = 9.9, p =$   
887 0.0004). Specifically, the average number of key presses in  $LO_{new}$  (Block 8)  
888 was significantly more than Blocks 5-6 and  $LO_{match}$  (paired t-test, Blocks  
889 5-6:  $t(18) = 4.1, p = 0.0007$ ;  $LO_{match}$ :  $t(18) = 3.6, p = 0.002$ ). There was no  
890 significant difference between Blocks 5-6 and  $LO_{match}$  (paired t-test,  $t(18) =$   
891 0.7,  $p = 0.49$ ), supporting the model's prediction of positive  $MO$  transfer in  
892 this condition. The model predicted that  $LO_{mismatch}$  performance should be  
893 between  $LO_{new}$  and  $LO_{match}$ :  $LO_{mismatch}$  performance should reflect positive  
894  $LO$  transfer but negative  $MO$  transfer. This was observed qualitatively,  
895 though the results did not reach significance (paired t-test,  $LO_{match}$ :  $t(18) =$   
896 1.6,  $p = 0.13$ ;  $LO_{new}$ :  $t(18) = 1.4, p = 0.18$ ). These results replicate the  
897 negative transfer effects in the second stage of Block 8 shown in Experiment  
898 1 (Fig. 4A) and Experiment 2 (Fig. 8D). In addition, they provide initial  
899 support for the compositionality hypothesis of the model, with intermediary  
900 transfer in the mismatch condition.

901 We confirmed the previous results by analyzing the proportion of trials  
902 in which the first key press was correct. We found that, in the first 3 trials  
903 for each of the 4 branches in the second stage (Fig. 13B), there was a main  
904 effect of  $LO$  condition (1-way repeated measure ANOVA,  $F(2, 36) = 7.2, p =$   
905 0.002) on the proportion of correct choices for the first press of each trial. In  
906 particular, we found no significant difference between  $LO_{mismatch}$  and  $LO_{new}$   
907 (paired t-test,  $t(18) = 0.56, p = 0.58$ ), while the performance of  $LO_{match}$  was  
908 significantly higher than  $LO_{mismatch}$  and  $LO_{new}$  (paired t-test,  $LO_{mismatch}$ :

909  $t(18) = 2.6, p = 0.017$ ;  $LO_{new}$ :  $t(18) = 4.4, p = 0.0003$ ). These results  
910 suggested that the mismatch between  $MO_1$  and  $LO_3$  impacted participants'  
911 performance, a marker of negative option ( $MO$ ) transfer. In the first three  
912 iterations, participants' first presses indicated that they were not able to  
913 efficiently re-compose the  $LO_{mismatch}$  into a new mid-level option.

914 To better investigate participants' choices before they experienced any  
915 new information in a new block, we also computed the probability of a correct  
916 first key press for the second stage of the first trial of each of the 4 branches  
917 in the Blocks 5-8 (Fig. 13D). We found a main effect of block (Friedman  
918 Test,  $\chi^2(2, 36) = 20, p < 0.0001$ ). Specifically, Blocks 5-6 and  $LO_{match}$  were  
919 significantly above chance (sign test, both  $p < 0.0001$ );  $LO_{mismatch}$  was not  
920 significantly different from chance (sign test,  $p = 0.34$ );  $LO_{new}$  was signifi-  
921 cantly below chance (sign test,  $p = 0.0007$ ). There was a marginal difference  
922 between  $LO_{match}$  and  $LO_{mismatch}$  (sign test,  $p = 0.09$ ), but no significant  
923 difference between  $LO_{mismatch}$  and  $LO_{new}$  (sign test,  $p = 0.24$ ). These results  
924 further showed that the mismatch condition impacted participants' perfor-  
925 mance on the first press due to negative option ( $MO$ ) transfer, and replicated  
926 the strong negative transfer in Block 8 in Experiment 1 and Experiment 2.  
927 The Option Model captured participants' behavior well (Fig. 13ABD, see  
928 Table 1 for model parameters).

929 *5.2.2. Second press reveals benefit of option composition*

930 The results so far supported one of our predictions,  $LO_{match} > LO_{mismatch}$ ,  
931 by showing that performance in the mismatch condition was impacted due  
932 to negative  $MO$  transfer. We next sought evidence for our second predic-  
933 tion,  $LO_{mismatch} > LO_{new}$ , where we hypothesized better performance in the  
934 mismatch condition by composing the first stage policy of  $MO_1$  and  $LO_3$ .

935 In terms of performance on the first press in each trial, we did not found  
936 a significant difference between the two conditions (Fig. 13B). However, this  
937 might be because the negative  $MO$  transfer reduced the benefit of compo-  
938 sitionality, making it less detectable on the first press, also reflected by the  
939 small effect from the Option Model in Fig. 13B. Positive  $LO$  transfer thus  
940 might only show a more significant effect after the first press unexpectedly  
941 failed (from negative transfer of  $MO_1$ ).

942 Therefore, we further computed the proportion of correct choices on the  
943 second press in those trials where the first press was incorrect (Fig. 13C).  
944 Indeed, we found that the proportion of correct choices on the second press  
945 was significantly higher in the mismatch condition than the new condition  
946 (paired t-test,  $t(17) = 2.8, p = 0.012$ ). This result supports our second pre-  
947 diction,  $LO_{mismatch} > LO_{new}$ , revealing a benefit in the mismatch condition  
948 compared to the new condition in participants re-composing an old  $LO$  into  
949 a non-matching  $MO$ .

950 *5.2.3. Mturk participants showed benefits of option composition*

951 We collected a larger and independent sample on Mturk. Mturk par-  
952 ticipants also improved over Blocks 1-6 (Supplementary Fig. S10B) and  
953 within block (Supplementary Fig. S17), though their asymptotic perfor-  
954 mance (Blocks 5-6) was lower than the in-lab population. Specifically, we  
955 compared the average number of key presses in Blocks 5-6 in the first and  
956 second stages for both in-lab and Mturk populations. There was a main ef-  
957 fect of stage and a marginal interaction of population and stage (2-way mixed  
958 ANOVA, stage:  $F(1, 78) = 7.1, p = 0.009$ ; interaction:  $F(1, 78) = 3.1, p =$   
959  $0.08$ ). In particular, for the first stage, Mturk population was not significantly  
960 worse than the in-lab population (unpaired t-test,  $t(78) = 0.17, p = 0.86$ );  
961 but for the second stage, which was the focus of our analysis, Mturk pop-  
962 ulation was significantly worse than the in-lab population (unpaired t-test,  
963  $t(76) = 3.2, p = 0.002$ ).

964 In the second stage (Fig. 13E), there was a main effect of block on  
965 number of presses ( $F(2, 120) = 17, p < 0.0001$ ). Specifically, the average  
966 number of key presses in  $LO_{new}$  was significantly more than  $LO_{match}$  and  
967  $LO_{mismatch}$  (paired t-test,  $LO_{match}$ :  $t(60) = 4.6, p < 0.0001$ ;  $LO_{mismatch}$ :  
968  $t(60) = 3.8, p = 0.0004$ ).  $LO_{match}$  was not significantly different from Blocks  
969 5-6 and  $LO_{mismatch}$  (paired t-test, Blocks 5-6:  $t(60) = 0.26, p = 0.8$ ;  $LO_{mismatch}$ :  
970  $t(60) = 0.8, p = 0.42$ ).

971 The proportion of correct first press choices (Fig. 13F) showed a similar  
972 pattern: there was a main effect of  $LO$  condition ( $F(2, 120) = 15, p < 0.0001$ )

973 on the proportion of correct choices. In particular, the proportion of correct  
974 choice for  $LO_{new}$  was significantly lower than  $LO_{mismatch}$  and  $LO_{match}$  (paired  
975 t-test,  $LO_{mismatch}$ :  $t(60) = 4.7, p < 0.0001$ ;  $LO_{match}$ :  $t(60) = 5.1, p < 0.0001$ )  
976 in Block 7. There was no significant difference between  $LO_{mismatch}$  and  
977  $LO_{match}$  performance (paired t-test,  $t(60) = 0.54, p = 0.59$ ). There was  
978 no difference between the mismatch condition and the new condition for sec-  
979 ond key presses (paired t-test,  $t(52) = 0.08, p = 0.94$ , Fig. 13G), contrary to  
980 in-lab participants (Fig. 13C). This difference could be attributed to MTurk  
981 participants' lower task engagement. Indeed, contrary to in lab participants,  
982 MTurk participants' performance was at chance for second key press (MTurk:  
983 paired t-test,  $t(53) = 1.6, p = 0.13$ ; in-lab  $t(17) = 3.4, p = 0.003$ ). Directly  
984 comparing MTurk and in-lab population for the proportion of correct sec-  
985 ond key press in both the mismatch and new conditions revealed a marginal  
986 effect of condition and a marginal interaction of population and condition  
987 (2-way mixed ANOVA, condition:  $F(1, 69) = 3.3, p = 0.07$ ; interaction:  
988  $F(1, 69) = 3.7, p = 0.06$ ). This supports our interpretation that MTurk  
989 participants did not attempt to find the correct answer following an error,  
990 making the second press error analysis in this population difficult to interpret.

991 Finally, we looked at the probability of a correct first press in the very  
992 first trial of each of the 4 branches in the second stage (Fig. 13H). There  
993 was a main effect of block (Friedman test,  $\chi^2(2, 120) = 17, p = 0.0002$ ). In  
994 particular, Blocks 5-6 and  $LO_{mismatch}$  were significantly above chance (sign  
995 test, both  $p = 0.004$ )  $LO_{match}$  was marginally above chance (sign test,  $p =$

996 0.07);  $LO_{new}$  was significantly below chance (sign test,  $p < 0.0001$ ).

997 These results can be interpreted in one of two ways. The similar per-  
998 formance between  $LO_{match}$  and  $LO_{mismatch}$  suggests that participants were  
999 able to efficiently re-compose the first stage of  $MO_1$  with  $LO_3$  in the mis-  
1000 match condition in Block 7, so that they did not suffer from  $MO$  negative  
1001 transfer, as did in-lab participants. Alternatively, this result might indicate  
1002 a lack of  $MO$  transfer (and only positive  $LO$  transfer) in both the match and  
1003 mismatch condition. The latter interpretation is supported by the fact that  
1004 second stage performance in  $LO_{match}$  was lower in MTurk participants than  
1005 it was for in-lab participants in all measures (unpaired t-test, number of key  
1006 presses in the first 10 trials of Blocks 5-6:  $t(78) = 1.8, p = 0.08$ ; proportion  
1007 of correct choices in match condition:  $t(78) = 2.4, p = 0.019$ ).

1008 The Option Model could capture the negative transfer effect in  $LO_{new}$   
1009 and thus the difference between  $LO_{new}$  and  $LO_{mismatch}$  (Fig. 13EF). How-  
1010 ever, it could not fully reproduce the lack of difference between  $LO_{match}$  and  
1011  $LO_{mismatch}$ , since the model would first try to transfer  $LO_1$  in the mismatch  
1012 condition, resulting in worse performance for  $LO_{mismatch}$ .

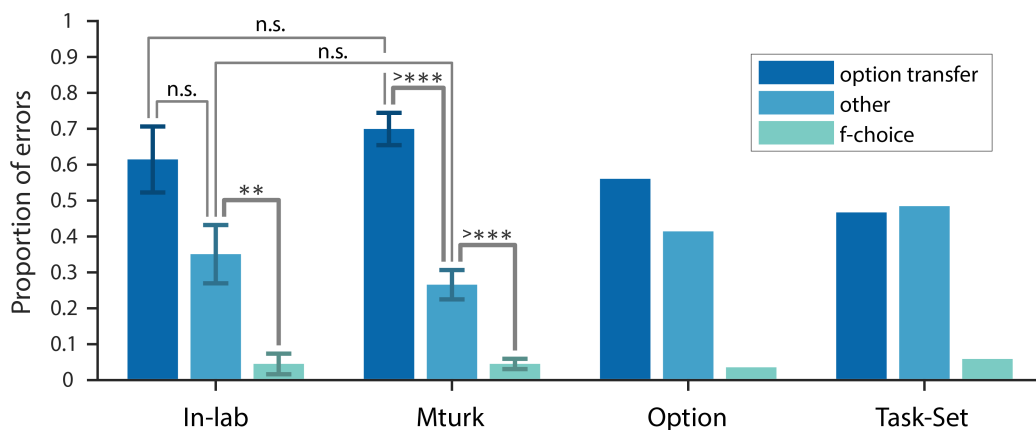

Figure 14: Experiment 4 second stage errors reveal temporal options transfer and compositionality. Error type analysis of the second stage in Block 7 for the mismatch condition for in-lab participants, Mturk participants, the Option Model and the Task-Set Model.

1013 This interpretation might suggest that the Task-Set Model explains the  
1014 Mturk population better, indicating a lack of temporally extended options,  
1015 and makes a specific prediction: second stage errors should not be impacted  
1016 by first stage information. To test this prediction, we analyzed the spe-  
1017 cific errors participants made, as this is a specific hallmark of temporally  
1018 extended option transfer vs. task-sets (Fig. 4A). Contrary to the predic-  
1019 tion made by the Task-Set model, but consistent with the Option Model  
1020 prediction, Mturk participants did demonstrate the behavioral signature of  
1021 negative option (*MO*) transfer in the mismatch condition (Fig. 14): they  
1022 made significantly more “option transfer” errors than “other” errors (paired  
1023 t-test,  $t(53) = 4.8, p < 0.0001$ ). While the comparison was not significant for  
1024 in-lab participants (paired t-test,  $t(17) = 1.5, p = 0.16$ ), a direct comparison



1025 between in-lab and Mturk populations did not reveal an effect of population  
1026 (2-way mixed ANOVA,  $F(2, 140) = 0.74, p = 0.48$ ). Thus, our results indi-  
1027 cate that both MTurk participants and in-lab participants used temporally  
1028 extended *MOs*, although MTurk participants were overall less successful at  
1029 transferring them to facilitate decision making in the second stage. The  
1030 results are consistent with participants re-composing low-level options into  
1031 higher-level options.

## 1032 6. Discussion

1033 Our findings provide novel and strong support for the acquisition of op-  
1034 tions in healthy human adults. Options can be thought of as choices that  
1035 are more abstract than simple motor actions, but can be taken as a single  
1036 choice. Using a novel two-stage protocol, we provide evidence that humans  
1037 create options, and flexibly transfer and compose previously learned options.  
1038 This transfer and composition ability guides exploration in novel contexts  
1039 and speeds up learning when the options are appropriate, but impairs per-  
1040 formance otherwise, as predicted by the options framework [11]. Model simu-  
1041 lations showed that only a model including temporal hierarchy could account  
1042 for all results, suggesting that human participants not only build state ab-  
1043 stractions with one-step task-sets ([67]), but also temporal abstractions in  
1044 the action space with multi-step options.

1045 We developed a new model, the Option Model, to account for partic-  
1046 ipants' behavior. The Option Model includes features from our previous

1047 hierarchical structure learning model ([9, 32, 66]) and the hierarchical rein-  
1048 forcement learning (HRL) options framework ([43]). In our previous hierar-  
1049 chical structure learning model, we used non-parametric priors (CRP) over  
1050 latent variables that represented the currently valid policy to create *state*  
1051 *abstractions*: this allowed the model to cluster different contexts together if  
1052 the same task-set applied. This CRP prior enables the agent to identify (via  
1053 Bayesian inference) novel contexts as part of an existing cluster if the cluster-  
1054 defined task-set proves successful, resulting in more efficient exploration and  
1055 faster learning.

1056 On the other hand, the original formulation of the HRL options frame-  
1057 work ([43]) augments the action space of traditional flat RL with *temporal*  
1058 *abstractions* called options. Each option is characterized by an initiation set  
1059 that specifies which states the option can be activated, a termination func-  
1060 tion that maps states to a probability of terminating the current option, and  
1061 an option-specific policy (that leads the agent to a potentially meaningful  
1062 and useful subgoal).

1063 Our Option Model is inspired by the fact that task-sets and options are  
1064 similar in essentials: they are policies that an agent can select as a whole, and  
1065 then apply at a lower level of abstraction (applying it to make a motor choice  
1066 in response to a stimulus for task-sets, or applying it across time until ter-  
1067 mination in the case of an option [cite my structure learning book chapter]).  
1068 Thus, our model brings together state and temporal abstractions by using  
1069 option-specific CRP priors to implement option-specific policies that can be

1070 flexibly selected in different contexts if they share the same environmental  
1071 contingencies. Our model captures the essence of the options framework de-  
1072 spite some subtle differences. Here, we discuss how our Option Model relates  
1073 to each part of the HRL options framework.

#### 1074 *Initiation set*

1075 The initiation set specifies the set of states where an option can be se-  
1076 lected. The observable states in our tasks are the shapes shown on the screen.  
1077 Therefore, at first, the initiation sets of *HO* and *MO* are first stage stimuli  
1078 (e.g. circle and square, Fig. 1B), whereas the initiation sets of *LO* are sec-  
1079 ond stage stimuli. However, the optimal policies were also dependent on the  
1080 block; thus participants needed to infer the hidden context (*state abstrac-*  
1081 *tion*) dictated by block. Our CRP implementation can thus be thought of  
1082 as continuously adding new block contexts to the initiation set of an option  
1083 throughout the task. The ability to add new contexts to the initiation sets  
1084 provides our Option Model the crucial flexibility needed to achieve transfer  
1085 and composition, as demonstrated by human participants. For example, if  
1086  $LO_3$  was tied solely to the context of Block 2, where it was first learned, we  
1087 would not observe the benefit of option composition in Experiment 4 in the  
1088 mismatch condition.

#### 1089 *Termination function*

1090 An option's termination function maps each state to the probability of  
1091 terminating the current option (i.e. not using its policy anymore). How to

1092 terminate an option is closely related to the underlying theoretical question  
1093 of credit assignment, which arises naturally in tasks that require hierarchi-  
1094 cal reasoning ([71]): if the current policy does not generate any (pseudo-)  
1095 reward for a while, should the agent continue improving the current policy  
1096 or terminate it and use another policy or even something new?

1097 With a termination function as described in the original HRL options  
1098 framework, credit assignment happens in a very specific way: the policy of the  
1099 currently selected option (or options if multiple nested options are selected) is  
1100 updated until termination is reached. In our task, this would make behavior  
1101 very inflexible. For example, when an agent entered the second stage of  
1102 Block 8 in Experiment 1 (Fig, 1B) for the first time after having correctly  
1103 made a choice for the circle in the first stage, the agent would likely use  
1104  $LO_1$  due to negative transfer of  $MO_1$  and thus not receive reward. Because  
1105 the termination function only takes state as an input, the agent would keep  
1106 overwriting the  $LO_1$  policy with  $LO_5$  policy until termination, and thus not  
1107 be able to reuse  $LO_1$  down the line.

1108 Our Option Model, however, uses a more flexible form of option ter-  
1109 mination. Specifically, we use Bayesian inference (Sec. 2.1.5), which was  
1110 introduced in our previous hierarchical structure learning model ([9]). At  
1111 the end of each choice, the model updates the likelihood of each option being  
1112 valid based on the observed reward feedback, which then determines whether  
1113 the model should stop using the current option. Moreover, Q-learning only  
1114 operates on the option that has the highest posterior, thus assigning credit

1115 retrospectively to the best cause ([72]). Therefore, the Option Model is more  
1116 likely to create a new  $LO_5$  and learn its policy from scratch, making it more  
1117 flexible at learning and selecting options.

1118 The crucial difference between the two is that the Option Model would  
1119 create a new  $LO_5$  and learn its policy from scratch, without overwriting  
1120 the original  $LO_1$  policy. While the Option Model can capture participants'  
1121 choices well across all four experiments, the current experimental protocol  
1122 was not designed specifically to test credit assignment to options, and could  
1123 not distinguish between these two possibilities. This remains an important  
1124 question for future research.

1125 There is another credit assignment problem that is not fully addressed by  
1126 our current protocol and modeling: choices by lower level options may affect  
1127 the termination of higher level options. For example, if you get punished for  
1128 boiling potatoes, should you credit this to the lower level option (boiling) or  
1129 to the higher level option (making potatoes in the first place). Should you  
1130 plan to cook vegetables instead, or just roast the potatoes? We have some  
1131 evidence for both levels of credit assignment (e.g. in Block 7 of Experiment  
1132 2, or Block 8 in Experiment 1; Fig. 1B), when participants were experiencing  
1133 many errors in the second stage using  $LO_1$  and  $LO_2$ . Participants might not  
1134 only consider terminating or re-learning the current  $LO$ , but also naturally  
1135 attribute some of the negative feedback to the choices they made in the  
1136 first stage regarding  $MO$  or  $HO$ . Indeed, we observed that second stage  
1137 errors potentially resulted in more “wrong  $HO$ ” errors in the first stage of

1138 Experiment 2 (Supplementary Fig. S7).

1139 In our Option Model (Sec. 2.1.5), for simplicity, first stage choices were  
1140 only determined by learning within the first stage and were not sensitive to  
1141 reward feedback in the second stage. It will be important in future research  
1142 to better understand interactions between option levels for credit assignment.  
1143 When considered together with the termination problem, these future direc-  
1144 tions may help trace the underlying neural mechanisms for credit assignment  
1145 in human learning and hierarchical decision making.

#### 1146 *Option-specific policy*

1147 The most important component of an option is the option-specific policy:  
1148 what lower level-choices (either simpler options or basic actions) it constrains.  
1149 In this paper, we focused on the transfer of option-specific policy to test  
1150 theoretical benefits of the options framework.

1151 Theoretical work ([11]) suggested that useful options should facilitate  
1152 exploration and speed up learning. Indeed, we observed speed up in learning  
1153 through the positive transfer effects. For example, in Experiment 1, the  
1154 second stage of Block 7 provided a test of positive option transfer in terms  
1155 of both number of presses (Fig. 2B) and choice types (Supplementary Fig.  
1156 S6). Importantly, this positive transfer was not interfered by the negative  
1157 transfer in its first stage (Fig. 2B), suggesting that participants transferred  
1158 mid-level options (*MO*) as a whole.

1159 Moreover, the learning benefit was evident even in the first press (Fig.

1160 4B, Fig. 6E, Fig. 8D): participants were already significantly above chance in  
1161 the first press, indicated that they could explore by immediately transferring  
1162 previously learned options.

1163 Previously learned option-specific policies also helped with option com-  
1164 position in the mismatch condition (Fig. 12) of Experiment 4 (Fig. 13).  
1165 While  $MO_1$  was usually followed by  $LO_1$  in Blocks 1, 3, 5, in the mismatch  
1166 condition,  $MO_1$  was followed by  $LO_3$  instead. This change indeed resulted  
1167 in “option transfer” errors (Fig. 14). However, the fact that  $LO_3$  had been  
1168 previously learned helped participants explore more efficiently. For example,  
1169 once participants figured out  $A_2$  was correct for the diamond, they would  
1170 more likely explore  $LO_3$ , and thus  $A_4$  for triangle.

1171 The HRL options framework also suggested that non-useful options can  
1172 slow down learning. Indeed, we observed negative option transfer effects in  
1173 the second stage across multiple experiments in terms of number of presses  
1174 (Fig. 2B, Fig. 6C, Fig. 8C, Fig. 13AE), and more importantly, error types  
1175 (Fig. 4A, Fig. 6D, Fig. 8D, Fig. 9, Fig. 14), that are consistent with  
1176 the predictions of the options framework. Note that the slow down was  
1177 due to negative transfer of previously learned option-specific policies. Thus  
1178 testing how having a wrong subgoal can impact learning performance is an  
1179 interesting future direction.

1180 We sought to confirm that participants were indeed learning option-  
1181 specific policies, not just action sequences. Our protocol specifically used  
1182 two second stage stimuli following each first stage stimulus (Fig. 1B) to

1183 avoid this potential confound. If, for example, circle was always followed by  
1184 diamond and square by triangle, participants would not need to pay atten-  
1185 tion to the actual stimulus in the second stage, and could instead plan a  
1186 sequence of actions in the first stage. In contrast, here, participants could  
1187 only perform well by selecting options (i.e. stimulus-dependent temporally  
1188 extended policies). While pure sequence learning could not account for our  
1189 results, we investigated whether it could contribute to some of its aspects.  
1190 Sequence learning would predict faster reaction times for actions that often  
1191 follow in a sequence ([73]). Therefore, we compared the reaction time for  
1192 the “sequence” and “non-sequence” error types in the second stage (Sec.  
1193 9.2). We did not find significant difference between the reaction time for  
1194 “sequence” and “non-sequence” error types at the beginning of blocks; we  
1195 only found such difference at the end of blocks (Supplementary Fig. S1, Fig.  
1196 S2, Sec. 9.2). This suggests that while the transfer effects we observe at the  
1197 beginning of each block could not be explained by pure sequence learning,  
1198 participants might develop sequence learning-like expectations over time in  
1199 a block, speeding up choices that came more frequently after each other.

1200 We tested predictions of HRL options framework through positive and  
1201 negative transfer of option-specific policies in the simplest possible set up of  
1202 tabular representation of state and action space. Multiple aspects could be  
1203 expanded on in future research to increase the generalizability of the policy in  
1204 real world scenarios. First, real world policies apply to much more complex  
1205 (continuous, multidimensional) state spaces. Recent work in AI expands the



1206 options framework to more realistic situations ([74]), where artificial agents  
1207 learn how to navigate a sequence of rooms with different shapes and sizes.  
1208 If each state in a room is naively parametrized in a tabular way by  $(x, y)$   
1209 coordinates, when the agent is placed in a new room of a different shape,  
1210 previously learned policy would be of not use. It is thus crucial to identify  
1211 meaningful features of the state space shared by different rooms. ([74]) pro-  
1212 posed learning options in a state space parametrized by distance from goals  
1213 (“agent space”) to bypass this limitation.

1214       Second, the low-level action space in real life conditions is also more com-  
1215 plex. A good example is our flexible use of tools ([75]). We can conceptualize  
1216 using various tools as taking actions. Humans demonstrate great flexibility  
1217 when improvising using different tools to solve the same problem or even  
1218 crafting new tools. If we simply represent actions in a tabular way, after  
1219 participants associated a particular tool (action) to solve a task, the policy  
1220 would be of no use if this particular tool is no longer provided in the fu-  
1221 ture. The key might again be figuring out meaningful dimensions of the tool  
1222 (action) space that are shared in different task scenarios, such as shape and  
1223 weight of the tool.

1224       Finally, even if two problems are different in terms of both state and  
1225 action space (e.g. learning to play piano vs learning to play violin ([38])),  
1226 knowledge of one might still help the other. Once one learned a piece on the  
1227 piano, the knowledge of music theory might serve as a model to guide option  
1228 transfer when learning the same piece on violin. These are important future

1229 directions for testing how humans transfer in those more real life scenarios,  
1230 which might provide insight into developing more flexible and human-like AI  
1231 systems with the HRL options framework.

### 1232 *Option discovery*

1233 One of the most important questions regarding options in AI is how to  
1234 discover meaningful options. Discovering useful options entails learning all  
1235 components of an option: initiation set, termination function, and option-  
1236 specific policy that leads to a meaningful sub-goal. In this paper, we designed  
1237 a protocol that focused on learning option-specific policies by making all other  
1238 features, including subgoals, trivial.

1239 Discovering options may be useful because of a key feature of our inter-  
1240 actions with our environment. In real world scenarios, it is frequent that  
1241 for a given observable state, the right choice to make depends on hidden  
1242 context, task demand, or past information. This property is referred to as  
1243 *non-Markovian*: the current observable information is insufficient to deter-  
1244 mine the next step. For example, when potatoes are peeled, we can use them  
1245 to make either roasted potatoes or mashed potatoes. Therefore, the state “  
1246 *peeled potatoes*” is a meaningful subgoal state, and peeling potatoes is its  
1247 corresponding option-specific policy.

1248 This non-Markovian property might contribute to the hierarchical and  
1249 compositional nature of human behavior. It is central to the original for-  
1250 mulation of the options framework ([43]), and is also a natural objective for

1251 option discovery. In relation to our protocol, the correct action for diamond  
1252 (Fig. 1B) varies from time to time in the same block. It makes sense to  
1253 create different options to capture this, and relate it to the inferred hidden  
1254 cause for why the correct actions change. Indeed, we observed that the non-  
1255 Markovian feature in our experiments encouraged participants to create and  
1256 transfer options at multiple levels of abstractions.

1257 We tested whether the environment needs to be non-Markovian to trigger  
1258 option creation. Specifically, we designed Experiment 3 by eliminating the  
1259 non-Markovian property from Experiment 1 and testing if that affects op-  
1260 tion learning and transfer (Fig. 11). Unsurprisingly, we found weaker option  
1261 transfer effects in Experiment 3; however, participants' behavior was still not  
1262 flat (Fig. 11, Supplementary Fig. S9). Thus, our results hint at the possibil-  
1263 ity that participants create temporal options (*MO*), even in the absence of a  
1264 need for it, echoing past results showing that humans tend to create structure  
1265 unnecessarily ([9, 70, 76, 77]). Furthermore, this may also show that objec-  
1266 tives for option discovery are not limited to solving non-markovian problems.  
1267 For example, ([12]) showed that humans could identify bottleneck states from  
1268 transition statistics, reflecting graph-theoretic objectives for option discovery  
1269 in humans.

### 1270 *The options framework and other learning systems*

1271 While our Option Model uses a simple form of model-free RL (Q-learning;  
1272 [1]) to learn option-specific policies, the options framework is general and not

1273 limited to just Q-learning. Options can be learned or used with model-free  
1274 methods ([11]) and model-based methods ([44]). It also has strong connec-  
1275 tions to successor representations ([78, 79]), which might provide objectives  
1276 for subgoal discovery.

1277 Moreover, in this paper, we gave examples of potential interaction of  
1278 options with the meta-learning system (Fig. 9) and sequence learning (Sec.  
1279 9.2) in human participants. How options might interact with other learning  
1280 systems is an important question for future research.

## 1281 **7. Conclusion**

1282 In summary, we found compelling evidence of option learning and transfer  
1283 in human participants by examining the learning dynamics of a novel two-  
1284 stage experimental paradigm. Through analyzing participants' behavioral  
1285 patterns and model simulations, we demonstrated the flexibility of option  
1286 transfer and composition at distinct levels in humans.

1287 Humans' ability to flexibly transfer previously learned skills is crucial for  
1288 learning and adaptation in complex real world scenarios. This ability is also  
1289 one of the fundamental gaps that sets humans apart from current state-of-  
1290 the-art AI algorithms. Therefore, our work trying to probe learning and  
1291 transfer in humans might also help provide inspirations for AI algorithms to  
1292 be more flexible and human-like.

## 1293 8. Acknowledgements

1294 We thank Katya Brooun, Ham Huang, Helen Lu, Sarah Master, and  
1295 Wendy Shi for their substantial contribution to the project. We thank Rich  
1296 Ivry, Milena Rmus and Amy Zou for feedback on this draft. This work was  
1297 supported by NIMH RO1MH119383.

## 1298 9. Supplement

### 1299 9.1. Potential asymmetry in Block 7 of Experiment 1

1300 We checked whether the performance of circle and square in Block 7  
1301 was asymmetrically affected due to the interleaving of odd and even blocks  
1302 (Fig. 1B). Specifically, participants might start Block 7 by using  $HO_1$  in  
1303 odd blocks; thus the negative transfer in the first stage of Block 7 would be  
1304 primarily due to more key presses from the square, not the circle.

1305 To test this possibility, we calculated average number of key presses in  
1306 the first 5 trials for circle and square respectively in Block 7. However, we  
1307 found no significant difference between the performance of circle and square  
1308 in the first stage (paired t-test,  $t(24) = 1.38, p = 0.18$ ); we also found no  
1309 significant difference between the performance in the second stage following  
1310 circle and square (paired t-test,  $t(24) = 0.44, p = 0.66$ ).

### 1311 9.2. Second stage reaction time and sequence learning effects

1312 Sequence learning ([73]) predicts that the reaction time of the “sequence”  
1313 type to be faster than the “non-sequence” type. Therefore, we calculated the

1314 average reaction time (Fig. S1) for both “sequence” and “non-sequence” error  
1315 types in Experiment 1 and 2.

### 1316 9.2.1. Experiment 1

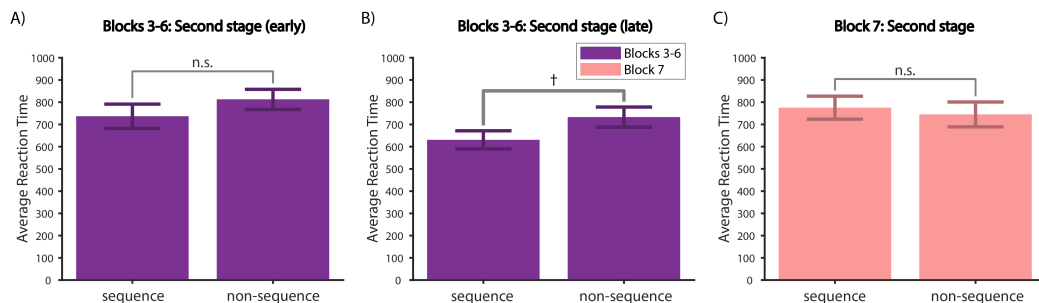

Supplementary Figure S1: Experiment 1 reaction time. (A) Average reaction time for trials 1-7 for each of the 4 branches in the second stage for Blocks 3-6 for sequence (left) and non-sequence (right) error types. (B) Same as (A) for trials 8-15. (C) Average reaction time for sequence (left) and non-sequence (right) error types in the second stage of Block 7.

1317 We broke down each block to 2 different time periods: early (trials 1-7 for  
1318 each of the 4 branches in the second stage) and late (trials 8-15 for each of  
1319 the 4 branches). Aggregating Blocks 3-6, we found a marginal effect of time  
1320 period (2-way repeated measure ANOVA,  $F(1, 21) = 3.0, p = 0.099$ ), which  
1321 might be due to participants generally becoming faster as they progressed  
1322 within a block. We also found a main effect of error type (2-way repeated  
1323 measure ANOVA,  $F(1, 21) = 4.5, p = 0.046$ ) on reaction time. Specifically,  
1324 we found no significant difference ( $t(23) = 1.3, p = 0.2$ ) between the reaction  
1325 time of the “sequence” and “non-sequence” error types in the early time  
1326 periods (Supplementary Fig. S1A). The “sequence” type was marginally  
1327 faster (paired t-test,  $t(22) = 1.9, p = 0.072$ ) than the “non-sequence” type in

1328 the late time period (Supplementary Fig. S1B). We also found no significant  
1329 difference (paired t-test,  $t(20) = 1.1, p = 0.3$ ) between the “sequence” and  
1330 “non-sequence” types in the entire Block 7 (Supplementary Fig. S1C). These  
1331 results suggest that the transfer effects we observed at the beginning of each  
1332 block could not be due to pure sequence learning, which only start to take  
1333 effect during learning saturation.

### 1334 9.2.2. Experiment 2

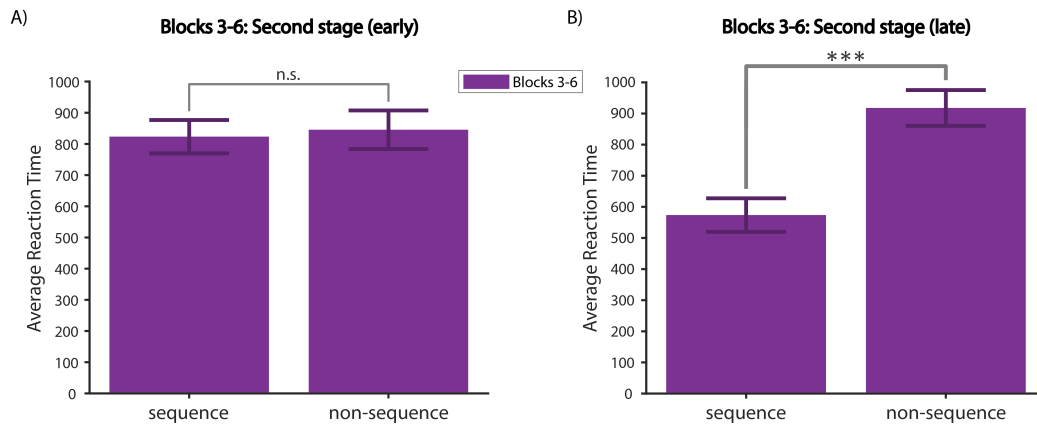

Supplementary Figure S2: Experiment 2 reaction time. (A) Average reaction time for trials 1-4 for each of the 4 branches in the second stage for Blocks 3-6 for sequence (left) and non-sequence (right) error types. (B) Same as (A) for trials 5-8.

1335 We also analyzed the reaction time (Fig. S2) of the “sequence” and “non-  
1336 sequence” error types in Blocks 5-6 in Experiment 2. As in Experiment 1,  
1337 we broke down each block into 2 halved time periods: early (trials 1-4 for  
1338 each of the 4 branches in the second stage) and late (trials 5-8 for each of  
1339 the 4 branches). We found a main effect of time period and error type,  
1340 and a significant interaction (2-way repeated measure ANOVA, time period:

1341  $F(1, 16) = 8, p = 0.012$ ; error type:  $F(1, 16) = 16, p = 0.0009$ ; interaction:  
 1342  $F(1, 16) = 15, p = 0.0013$ ). Specifically, there was no significant difference  
 1343 (Supplementary Fig. S2A) between the reaction time of the “sequence” and  
 1344 “non-sequence” types in the early time period (paired t-test,  $t(21) = 0.61, p =$   
 1345  $0.55$ ). However, the “sequence” type was significantly faster (Supplementary  
 1346 Figure S2B) than the “non-sequence” type in the late period (paired t-test,  
 1347  $t(17) = 4.8, p = 0.0002$ ). These results replicated the trend observed in  
 1348 the second stage of Experiment 1 (Supplementary Fig. S1A-B): sequence  
 1349 learning might take effect during learning saturation, but not the beginning  
 1350 of blocks, where we typically expect to observe transfer effects.

1351 *9.3. Parameters for model simulations*

1352 *9.3.1. Parameters used for main text*

1353 We used the set of parameters from Table 1 in the main text to track  
 1354 participants’ behavioral patterns both qualitatively and quantitatively.

| Exp   | Sample | Model    | $\alpha^1$ | $\beta^1$ | $\gamma^1$ | $f^1$  | $\alpha^2$ | $\beta^2$ | $\gamma^2$ | $f^2$  | m    |
|-------|--------|----------|------------|-----------|------------|--------|------------|-----------|------------|--------|------|
| Exp 1 | In-lab | Naive    | 0.5        | 4         | NA         | 0.0025 | 0.7        | 10        | NA         | 0.0001 | 0.01 |
|       |        | Flat     | 0.5        | 4         | NA         | 0.0025 | 0.7        | 10        | NA         | 0.0001 | 0.01 |
|       |        | Task-Set | 1          | 2         | 14         | 0.0004 | 0.8        | 3         | 3          | 0.0002 | 0.01 |
|       |        | Option   | 1          | 2         | 14         | 0.0004 | 0.8        | 3         | 3          | 0.0002 | 0.01 |
|       | Mturk  | Option   | 0.8        | 3         | 100        | 0.01   | 0.6        | 6         | 5          | 0.004  | 0.01 |
| Exp 2 | In-lab | Option   | 0.7        | 3         | 13         | 0.001  | 0.6        | 4         | 5          | 0.001  | 0.01 |
| Exp 3 | In-lab | Option   | 0.7        | 4         | 100        | 0.01   | 0.8        | 5         | 15         | 0.001  | 0.01 |
|       | Mturk  | Option   | 0.7        | 4         | 100        | 0.01   | 0.8        | 5         | 15         | 0.005  | 0.01 |
| Exp 4 | In-lab | Option   | 0.6        | 4         | 100        | 0.01   | 0.8        | 5         | 4          | 0.0002 | 0.01 |
|       |        | Option   | 0.6        | 4         | 100        | 0.01   | 0.4        | 4         | 5          | 0.002  | 0.01 |
|       |        | Task-Set | 0.6        | 4         | 100        | 0.01   | 0.4        | 4         | 5          | 0.002  | 0.01 |

Table 1: Parameters for the main text.



| Exp   | Sample | Model    | $\alpha^1$ | $\beta^1$ | $\gamma^1$ | $f^1$ | $\alpha^2$ | $\beta^2$ | $\gamma^2$ | $f^2$ | m    |
|-------|--------|----------|------------|-----------|------------|-------|------------|-----------|------------|-------|------|
| Exp 1 | In-lab | Naive    | 0.7        | 4         | NA         | 0.001 | 0.7        | 4         | NA         | 0.001 | 0.01 |
|       |        | Flat     | 0.7        | 4         | NA         | 0.001 | 0.7        | 4         | NA         | 0.001 | 0.01 |
|       |        | Task-Set | 0.7        | 4         | 14         | 0.001 | 0.7        | 4         | 4          | 0.001 | 0.01 |
|       |        | Option   | 0.7        | 4         | 14         | 0.001 | 0.7        | 4         | 4          | 0.001 | 0.01 |
|       | Mturk  | Option   | 0.7        | 4         | 100        | 0.01  | 0.5        | 4         | 4          | 0.005 | 0.01 |
| Exp 2 | In-lab | Option   | 0.7        | 4         | 100        | 0.01  | 0.7        | 4         | 4          | 0.001 | 0.01 |
| Exp 3 | In-lab | Option   | 0.7        | 4         | 100        | 0.01  | 0.7        | 4         | 20         | 0.001 | 0.01 |
|       | Mturk  | Option   | 0.7        | 4         | 100        | 0.01  | 0.5        | 4         | 20         | 0.005 | 0.01 |
| Exp 4 | In-lab | Option   | 0.7        | 4         | 100        | 0.01  | 0.7        | 4         | 4          | 0.001 | 0.01 |
|       | Mturk  | Option   | 0.7        | 4         | 100        | 0.01  | 0.5        | 4         | 4          | 0.005 | 0.01 |

Table 2: A second set of parameters that is constrained but still replicate transfer effects qualitatively.

1355 *9.3.2. A set of constrained parameters that capture behavior across all tasks*  
 1356 *qualitatively*

1357 In the main text, we selected parameters to try to trace participants’  
 1358 behavior patterns both quantitatively and qualitatively (Table 1). Here we  
 1359 used another set of parameters (Table 2) to (1) constrain parameters so  
 1360 that most experiments shared the same parameters while showing the qual-  
 1361 itatively trends in participants’ behavior and (2) show that the model can  
 1362 reproduce the same qualitative effects with a range of parameters.

1363 In particular, we used  $\alpha^1 = 0.7, \beta^1 = 4, \beta^2 = 4, m = 0.01$  for all  
 1364 experiments. For all in-lab experiments, we used  $\alpha^2 = 0.7, f^2 = 0.001$ ;  
 1365 for all Mturk experiments, we used  $\alpha^2 = 0.5, f^2 = 0.005$ , which indicate  
 1366 slower learning rate and faster forgetting. For Experiment 1 in-lab, we used  
 1367  $\gamma^1 = 14, f^1 = 0.001$ ; for all other experiments, we used  $\gamma^1 = 100, f^1 = 0.01$   
 1368 to implement a lack of transfer effects in the first stage. We used  $\gamma^2 = 20$  in

1369 Experiment 3 to model reduced option transfer in the second stage; for all  
1370 other experiments, we used  $\gamma^2 = 4$ .

1371 We recreated some of the representative analysis in the main text to  
1372 demonstrate that this second set of parameters can replicate the transfer  
1373 effects in human participants qualitatively well.

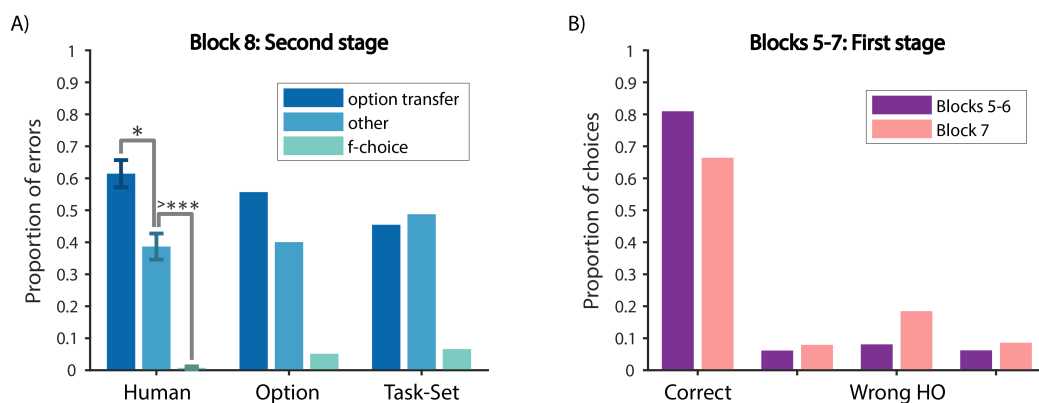

Supplementary Figure S3: Experiment 1 with parameters from Table 2. (A) Error type analysis of the second stage in Block 8 for participants (left), the Option Model (middle) and the Task-Set Model (right). (B) Choice type analysis of the first stage in Blocks 5-7 for the Option Model.

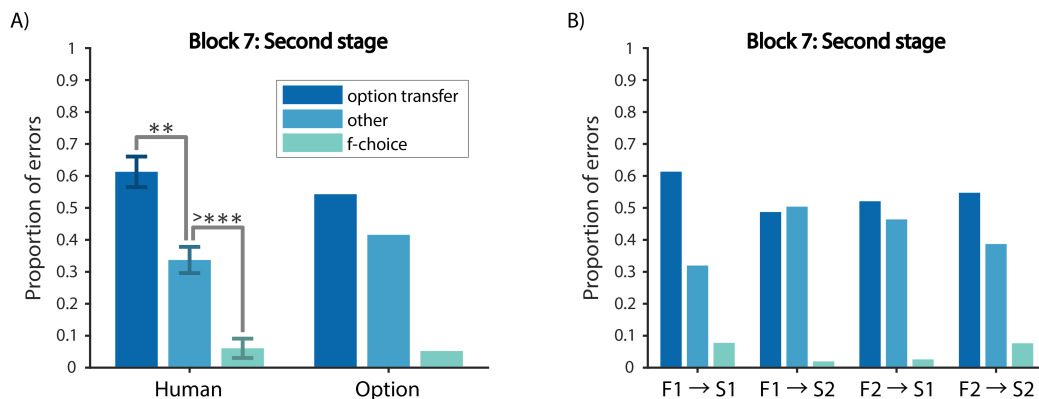

Supplementary Figure S4: Experiment 2 second stage choices with parameters from Table 2 (A) Error type analysis of the second stage in Block 7 for participants (left) and the Option Model (right). (B) Error type analysis for each of the 4 branches in the second stage of Block 7 for the Option Model.

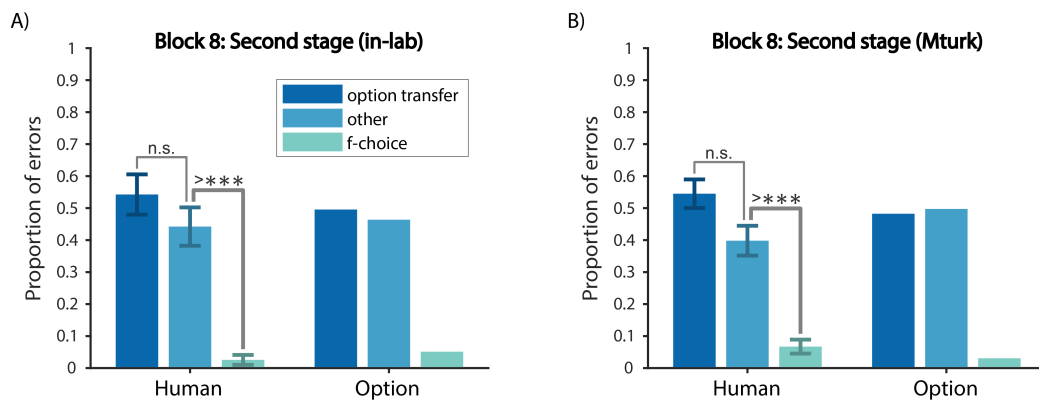

Supplementary Figure S5: Experiment 3 second stage choices with parameters from Table 2. Error type analysis of the second stage in Block 8 for (A) in-lab participants (left) and the Option Model (right), and (B) Mturk participants (left) and the Option Model (right).

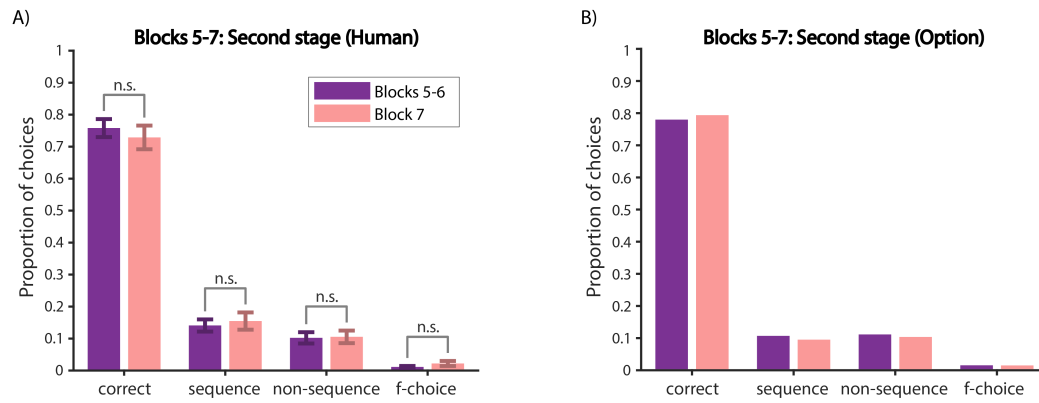

Supplementary Figure S6: Experiment 1 second stage choices. Choice type analysis of the second stage comparing Blocks 5-6 and Block 7 for (A) participants and (B) the Option Mode. There was no significant difference across all choice types, indicating positive transfer in the second stage of Block 7.

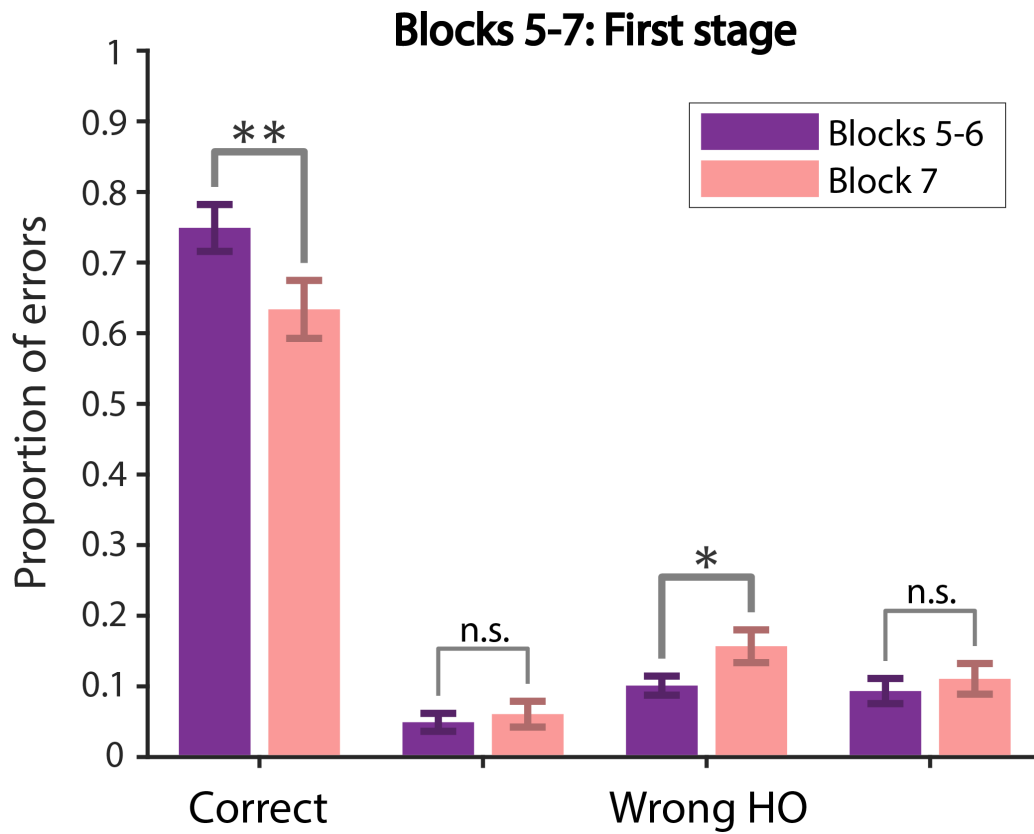

Supplementary Figure S7: Experiment 2 first stage choices. Choice type analysis of the first stage comparing Blocks 5-6 and Block 7. The only error type that significantly increased was the wrong *HO* error, suggesting that participants were perseverating in the first stage while learning the new mappings in the second stage of Block 7.

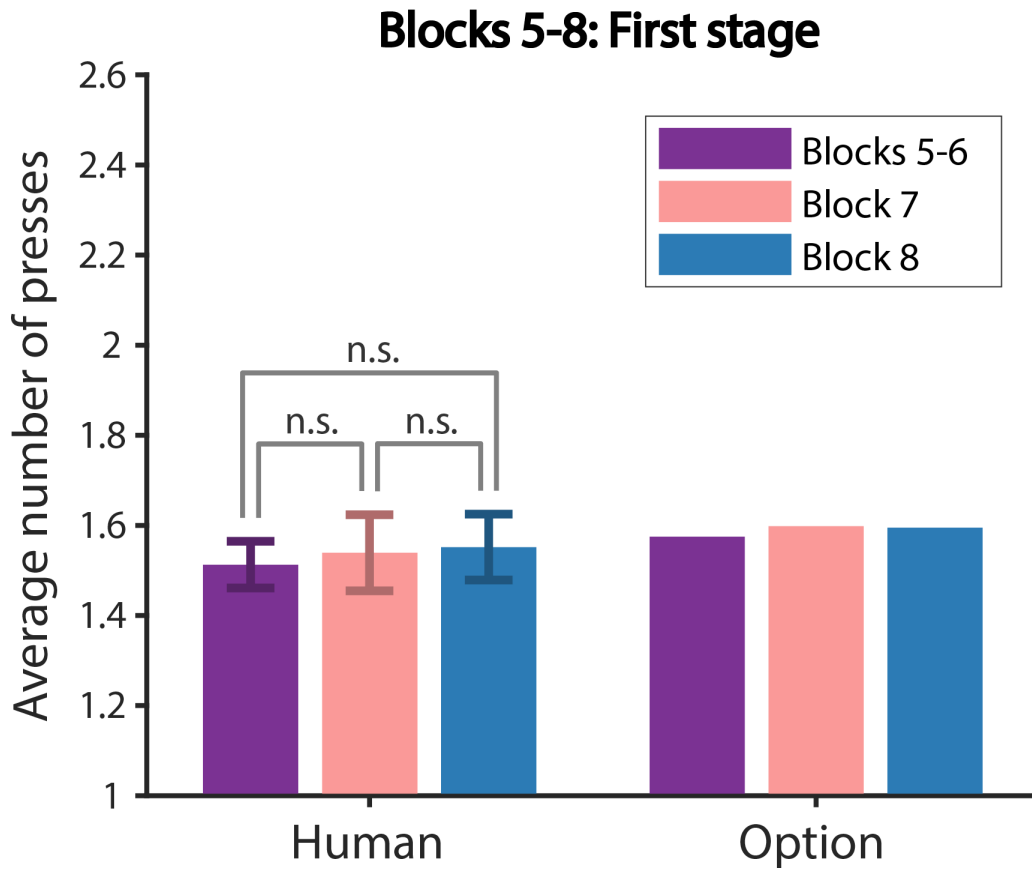

Supplementary Figure S8: Experiment 3 Mturk first stage choices. Average number of presses in the first 10 trials of Blocks 5-8 in the first stage for participants (left) and the Option Model (right). This shows a lack of transfer in the first stage, representative of Experiments 3-4 first stage for both in-lab and Mturk populations.

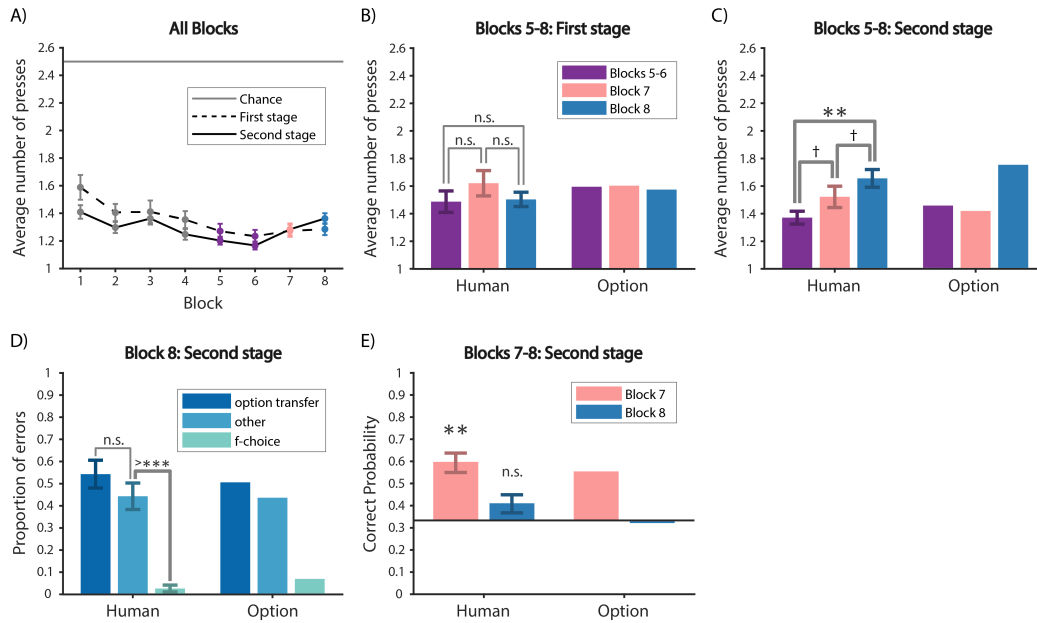

Supplementary Figure S9: Experiment 3 summary. (A) Average number of key presses in the first and the second stages per block. (B) Average number of key presses for the first 10 trials of Blocks 5-8 for the first stage for participants (left) and the Option Model (right). (C) Same as (B) for the second stage. (D) Error type analysis of the second stage in Block 8 for participants (left) and the Option Model (right). The proportion of option transfer error was not significantly different from other error, different from Experiment 1 and Experiment 2, suggesting reduced option transfer. (E) Probability of a correct first key press for the second stage of the first trial of each of the 4 branches in Blocks 7-8 for participants (left) and the Option Model (right).

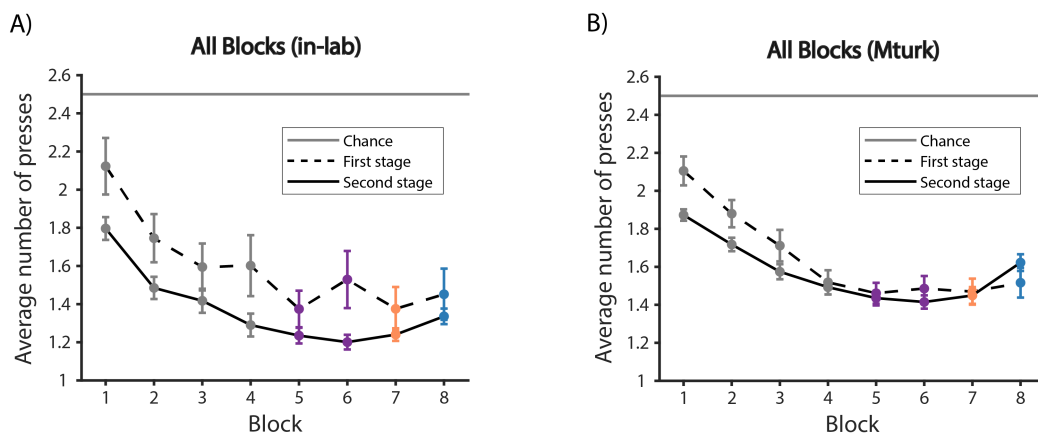

Supplementary Figure S10: Experiment 4 number of presses. Average number of key presses in the first and the second stages per block for (A) in-lab participants and (B) Mturk participants.

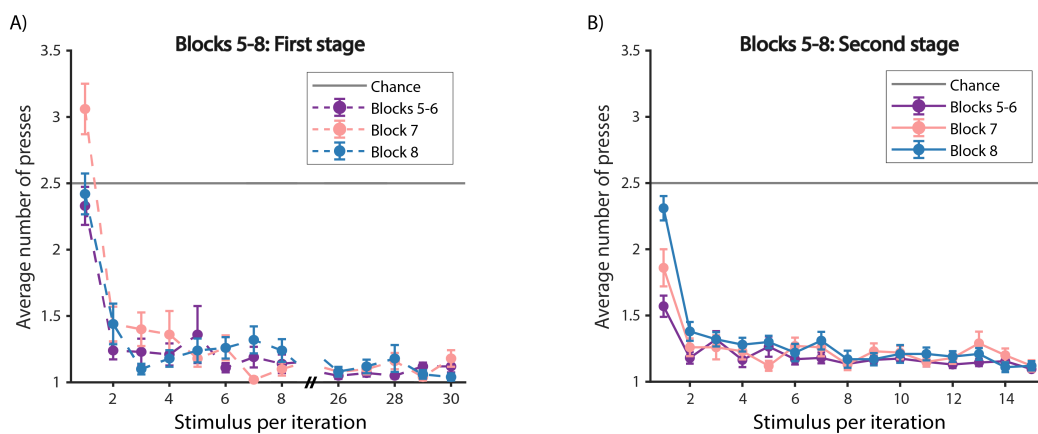

Supplementary Figure S11: Experiment 1 performance within Blocks 5-8 for in-lab participants. (A) First stage. (B) Second stage.



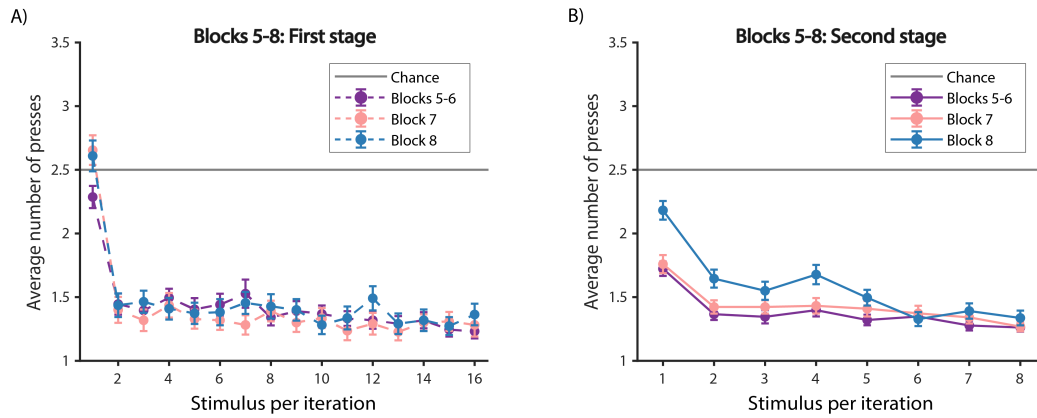

Supplementary Figure S12: Experiment 1 performance within Blocks 5-8 for Mturk participants. (A) First stage. (B) Second stage.

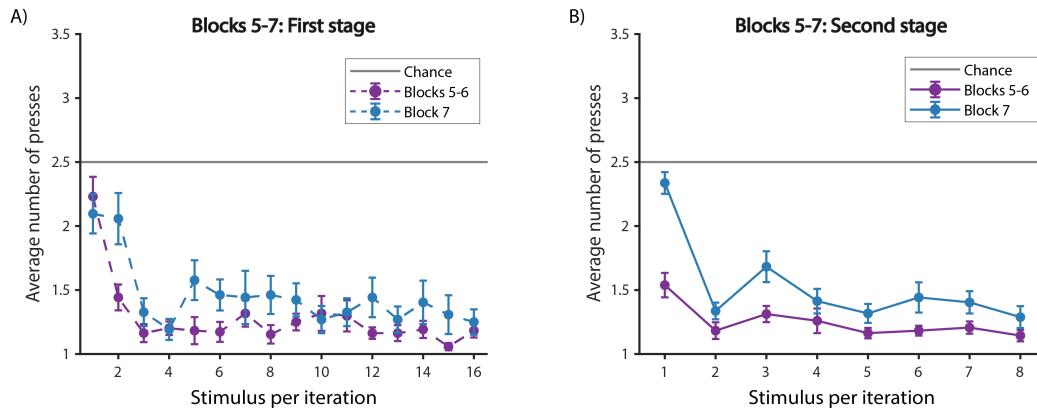

Supplementary Figure S13: Experiment 2 performance within Blocks 5-7. (A) First stage. (B) Second stage.

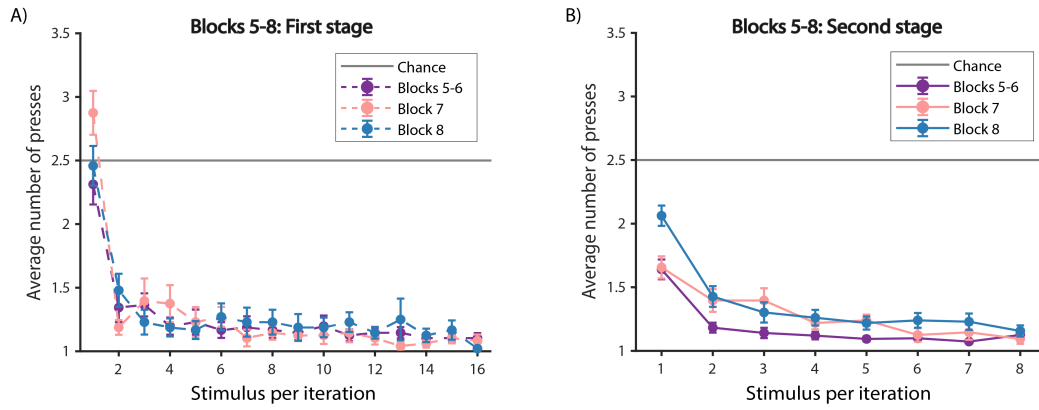

Supplementary Figure S14: Experiment 3 performance within Blocks 5-8 for in-lab participants. (A) First stage. (B) Second stage.

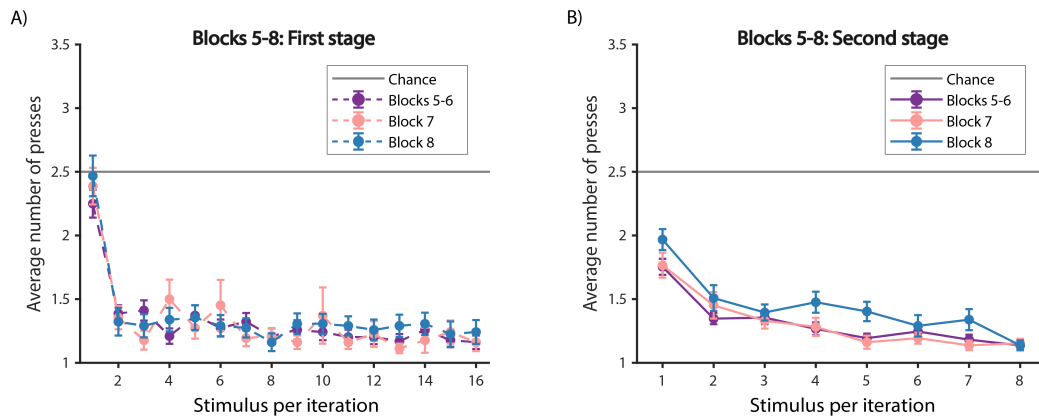

Supplementary Figure S15: Experiment 3 performance within Blocks 5-8 for Mturk participants. (A) First stage. (B) Second stage.

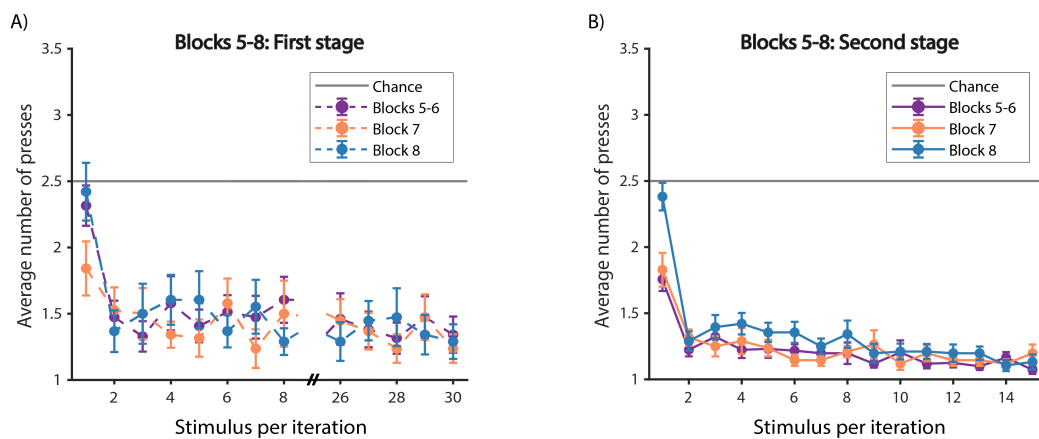

Supplementary Figure S16: Experiment 4 performance within Blocks 5-8 for in-lab participants. (A) First stage. (B) Second stage.

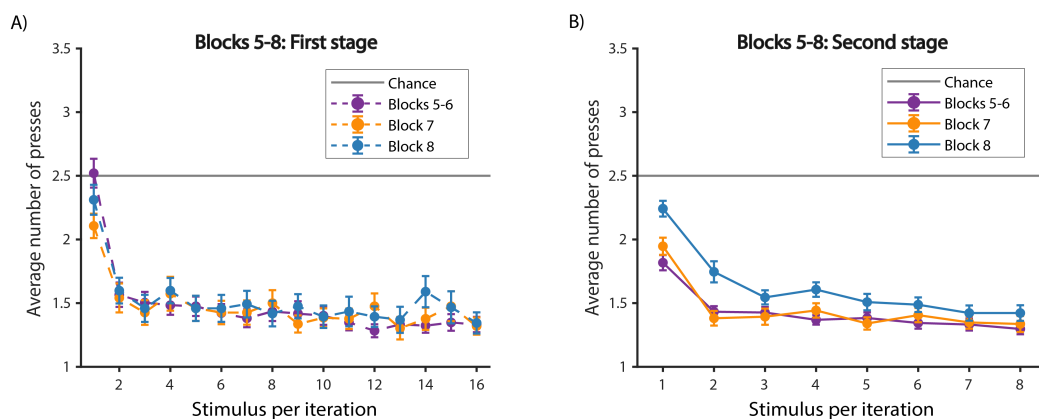

Supplementary Figure S17: Experiment 4 performance within Blocks 5-8 for Mturk participants. (A) First stage. (B) Second stage.

| Exp   | 18-25 | 26-30 | 31-35 | 36-40 | 41+ | Unknown | Total |
|-------|-------|-------|-------|-------|-----|---------|-------|
| Exp 1 | 14    | 18    | 26    | 23    | 33  | 2       | 116   |
| Exp 3 | 4     | 9     | 18    | 9     | 25  | 0       | 65    |
| Exp 4 | 14    | 17    | 24    | 15    | 40  | 0       | 110   |

Table 3: Age range distribution for Mturk participants in Experiments 1, 3, and 4.

## 1374 10. References

- 1375 [1] R. S. Sutton, A. G. Barto, Reinforcement learning: An introduction,  
1376 MIT press, 2018.
- 1377 [2] V. Mnih, K. Kavukcuoglu, D. Silver, A. A. Rusu, J. Veness, M. G.  
1378 Bellemare, A. Graves, M. Riedmiller, A. K. Fidjeland, G. Ostrovski,  
1379 et al., Human-level control through deep reinforcement learning, Nature  
1380 518 (2015) 529.
- 1381 [3] D. Silver, T. Hubert, J. Schrittwieser, I. Antonoglou, M. Lai, A. Guez,  
1382 M. Lanctot, L. Sifre, D. Kumaran, T. Graepel, et al., A general rein-  
1383 forcement learning algorithm that masters chess, shogi, and go through  
1384 self-play, Science 362 (2018) 1140–1144.
- 1385 [4] Y. Niv, Reinforcement learning in the brain, Journal of Mathematical  
1386 Psychology 53 (2009) 139–154.
- 1387 [5] J. Gläscher, N. Daw, P. Dayan, J. P. O’Doherty, States versus rewards:  
1388 dissociable neural prediction error signals underlying model-based and  
1389 model-free reinforcement learning, Neuron 66 (2010) 585–595.
- 1390 [6] Y. C. Leong, A. Radulescu, R. Daniel, V. DeWoskin, Y. Niv, Dynamic  
1391 interaction between reinforcement learning and attention in multidimen-  
1392 sional environments, Neuron 93 (2017) 451–463.
- 1393 [7] S. Farashahi, K. Rowe, Z. Aslami, D. Lee, A. Soltani, Feature-based  
1394 learning improves adaptability without compromising precision, Nature  
1395 communications 8 (2017) 1768.

- 1396 [8] A. G. Collins, M. J. Frank, How much of reinforcement learning is work-  
1397 ing memory, not reinforcement learning? a behavioral, computational,  
1398 and neurogenetic analysis, *European Journal of Neuroscience* 35 (2012)  
1399 1024–1035.
- 1400 [9] A. G. Collins, M. J. Frank, Cognitive control over learning: Creating,  
1401 clustering, and generalizing task-set structure., *Psychological review* 120  
1402 (2013) 190.
- 1403 [10] B. M. Lake, T. D. Ullman, J. B. Tenenbaum, S. J. Gershman, Building  
1404 machines that learn and think like people, *Behavioral and brain sciences*  
1405 40 (2017).
- 1406 [11] M. M. Botvinick, Y. Niv, A. C. Barto, Hierarchically organized be-  
1407 havior and its neural foundations: a reinforcement learning perspective,  
1408 *Cognition* 113 (2009) 262–280.
- 1409 [12] C. Diuk, A. Schapiro, N. Córdova, J. Ribas-Fernandes, Y. Niv,  
1410 M. Botvinick, Divide and conquer: hierarchical reinforcement learn-  
1411 ing and task decomposition in humans, in: *Computational and robotic*  
1412 *models of the hierarchical organization of behavior*, Springer, 2013, pp.  
1413 271–291.
- 1414 [13] A. Solway, C. Diuk, N. Córdova, D. Yee, A. G. Barto, Y. Niv, M. M.  
1415 Botvinick, Optimal behavioral hierarchy, *PLoS computational biology*  
1416 10 (2014) e1003779.
- 1417 [14] E. Koechlin, C. Ody, F. Kouneiher, The architecture of cognitive control  
1418 in the human prefrontal cortex, *Science* 302 (2003) 1181–1185.
- 1419 [15] E. Koechlin, T. Jubault, Broca’s area and the hierarchical organization  
1420 of human behavior, *Neuron* 50 (2006) 963–974.
- 1421 [16] D. Badre, Cognitive control, hierarchy, and the rostro–caudal organiza-  
1422 tion of the frontal lobes, *Trends in cognitive sciences* 12 (2008) 193–200.
- 1423 [17] D. C. Van Essen, J. H. Maunsell, Hierarchical organization and func-  
1424 tional streams in the visual cortex, *Trends in neurosciences* 6 (1983)  
1425 370–375.

- 1426 [18] T. S. Lee, D. Mumford, Hierarchical bayesian inference in the visual  
1427 cortex, *JOSA A* 20 (2003) 1434–1448.
- 1428 [19] C. Wessinger, J. VanMeter, B. Tian, J. Van Lare, J. Pekar, J. P.  
1429 Rauschecker, Hierarchical organization of the human auditory cortex  
1430 revealed by functional magnetic resonance imaging, *Journal of cogni-*  
1431 *tive neuroscience* 13 (2001) 1–7.
- 1432 [20] J. Bill, H. Pailian, S. J. Gershman, J. Drugowitsch, Hierarchical struc-  
1433 ture is employed by humans during visual motion perception, *bioRxiv*  
1434 (2019) 758573.
- 1435 [21] N. Zarr, J. W. Brown, Hierarchical error representation in medial pre-  
1436 frontal cortex, *NeuroImage* 124 (2016) 238–247.
- 1437 [22] O. Krigolson, C. Holroyd, Evidence for hierarchical error processing in  
1438 the human brain, *Neuroscience* 137 (2006) 13–17.
- 1439 [23] D. Badre, M. D’Esposito, Functional magnetic resonance imaging evi-  
1440 dence for a hierarchical organization of the prefrontal cortex, *Journal of*  
1441 *cognitive neuroscience* 19 (2007) 2082–2099.
- 1442 [24] D. Badre, M. D’esposito, Is the rostro-caudal axis of the frontal lobe  
1443 hierarchical?, *Nature Reviews Neuroscience* 10 (2009) 659.
- 1444 [25] B. W. Balleine, A. Dezfouli, M. Ito, K. Doya, Hierarchical control of  
1445 goal-directed action in the cortical–basal ganglia network, *Current Opin-*  
1446 *ion in Behavioral Sciences* 5 (2015) 1–7.
- 1447 [26] A. Dezfouli, B. W. Balleine, Actions, action sequences and habits: ev-  
1448 idence that goal-directed and habitual action control are hierarchically  
1449 organized, *PLoS computational biology* 9 (2013) e1003364.
- 1450 [27] A. Dezfouli, B. W. Balleine, Habits, action sequences and reinforcement  
1451 learning, *European Journal of Neuroscience* 35 (2012) 1036–1051.
- 1452 [28] M. Tomov, S. Yagati, A. Kumar, W. Yang, S. Gershman, Discovery  
1453 of hierarchical representations for efficient planning, *BioRxiv* (2018)  
1454 499418.

- 1455 [29] M. K. Eckstein, A. G. Collins, Computational evidence for  
1456 hierarchically-structured reinforcement learning in humans, bioRxiv  
1457 (2019) 731752.
- 1458 [30] M. J. Frank, D. Badre, Mechanisms of hierarchical reinforcement learn-  
1459 ing in corticostriatal circuits 1: computational analysis, *Cerebral cortex*  
1460 22 (2011) 509–526.
- 1461 [31] D. Badre, M. J. Frank, Mechanisms of hierarchical reinforcement learn-  
1462 ing in cortico-striatal circuits 2: Evidence from fmri, *Cerebral cortex*  
1463 22 (2011) 527–536.
- 1464 [32] A. G. Collins, J. F. Cavanagh, M. J. Frank, Human eeg uncovers latent  
1465 generalizable rule structure during learning, *Journal of Neuroscience* 34  
1466 (2014) 4677–4685.
- 1467 [33] M. Botvinick, D. C. Plaut, Doing without schema hierarchies: a recur-  
1468 rent connectionist approach to normal and impaired routine sequential  
1469 action., *Psychological review* 111 (2004) 395.
- 1470 [34] M. M. Botvinick, Multilevel structure in behaviour and in the brain:  
1471 a model of fuster’s hierarchy, *Philosophical Transactions of the Royal*  
1472 *Society B: Biological Sciences* 362 (2007) 1615–1626.
- 1473 [35] A. G. Collins, Learning structures through reinforcement, in: *Goal-*  
1474 *Directed Decision Making*, Elsevier, 2018, pp. 105–123.
- 1475 [36] I. Biederman, Recognition-by-components: a theory of human image  
1476 understanding., *Psychological review* 94 (1987) 115.
- 1477 [37] B. M. Lake, R. Salakhutdinov, J. B. Tenenbaum, Human-level concept  
1478 learning through probabilistic program induction, *Science* 350 (2015)  
1479 1332–1338.
- 1480 [38] N. T. Franklin, M. J. Frank, Compositional clustering in task structure  
1481 learning, *PLoS computational biology* 14 (2018) e1006116.
- 1482 [39] D. Wingate, C. Diuk, T. O’Donnell, J. Tenenbaum, S. Gershman, Com-  
1483 positional policy priors (2013).

- 1484 [40] J. Andreas, D. Klein, S. Levine, Modular multitask reinforcement learn-  
1485 ing with policy sketches, in: Proceedings of the 34th International Con-  
1486 ference on Machine Learning-Volume 70, JMLR. org, pp. 166–175.
- 1487 [41] D. Xu, S. Nair, Y. Zhu, J. Gao, A. Garg, L. Fei-Fei, S. Savarese, Neu-  
1488 ral task programming: Learning to generalize across hierarchical tasks,  
1489 in: 2018 IEEE International Conference on Robotics and Automation  
1490 (ICRA), IEEE, pp. 1–8.
- 1491 [42] X. B. Peng, M. Chang, G. Zhang, P. Abbeel, S. Levine, Mcp: Learn-  
1492 ing composable hierarchical control with multiplicative compositional  
1493 policies, arXiv preprint arXiv:1905.09808 (2019).
- 1494 [43] R. S. Sutton, D. Precup, S. Singh, Between mdps and semi-mdps: A  
1495 framework for temporal abstraction in reinforcement learning, *Artificial  
1496 intelligence* 112 (1999) 181–211.
- 1497 [44] M. Botvinick, A. Weinstein, Model-based hierarchical reinforcement  
1498 learning and human action control, *Phil. Trans. R. Soc. B* 369 (2014)  
1499 20130480.
- 1500 [45] A. McGovern, A. G. Barto, Automatic discovery of subgoals in rein-  
1501 forcement learning using diverse density (2001).
- 1502 [46] I. Menache, S. Mannor, N. Shimkin, Q-cutdynamic discovery of sub-  
1503 goals in reinforcement learning, in: *European Conference on Machine  
1504 Learning*, Springer, pp. 295–306.
- 1505 [47] Ö. Şimşek, A. G. Barto, Using relative novelty to identify useful tem-  
1506 poral abstractions in reinforcement learning, in: *Proceedings of the  
1507 twenty-first international conference on Machine learning*, ACM, p. 95.
- 1508 [48] M. C. Machado, C. Rosenbaum, X. Guo, M. Liu, G. Tesauero, M. Camp-  
1509 bell, Eigenoption discovery through the deep successor representation,  
1510 arXiv preprint arXiv:1710.11089 (2017).
- 1511 [49] M. C. Machado, M. G. Bellemare, M. Bowling, A laplacian framework  
1512 for option discovery in reinforcement learning, in: *Proceedings of the  
1513 34th International Conference on Machine Learning-Volume 70, JMLR.  
1514 org*, pp. 2295–2304.



- 1515 [50] Y. Jiang, S. Gu, K. Murphy, C. Finn, Language as an abstraction for hi-  
1516 erarchical deep reinforcement learning, arXiv preprint arXiv:1906.07343  
1517 (2019).
- 1518 [51] R. Fox, S. Krishnan, I. Stoica, K. Goldberg, Multi-level discovery of  
1519 deep options, arXiv preprint arXiv:1703.08294 (2017).
- 1520 [52] D. Jayaraman, F. Ebert, A. A. Efros, S. Levine, Time-agnostic  
1521 prediction: Predicting predictable video frames, arXiv preprint  
1522 arXiv:1808.07784 (2018).
- 1523 [53] S. Nair, C. Finn, Hierarchical foresight: Self-supervised learning  
1524 of long-horizon tasks via visual subgoal generation, arXiv preprint  
1525 arXiv:1909.05829 (2019).
- 1526 [54] D. Xu, R. Martín-Martín, D.-A. Huang, Y. Zhu, S. Savarese, L. Fei-Fei,  
1527 Regression planning networks, arXiv preprint arXiv:1909.13072 (2019).
- 1528 [55] J. F. Lehman, J. E. Laird, P. Rosenbloom, et al., A gentle introduction  
1529 to soar, an architecture for human cognition, *Invitation to cognitive  
1530 science* 4 (1996) 212–249.
- 1531 [56] J. R. Anderson, D. Bothell, M. D. Byrne, S. Douglass, C. Lebiere,  
1532 Y. Qin, An integrated theory of the mind., *Psychological review* 111  
1533 (2004) 1036.
- 1534 [57] S. Nason, J. E. Laird, Soar-rl: Integrating reinforcement learning with  
1535 soar, *Cognitive Systems Research* 6 (2005) 51–59.
- 1536 [58] W.-T. Fu, J. R. Anderson, From recurrent choice to skill learning:  
1537 A reinforcement-learning model., *Journal of experimental psychology:  
1538 General* 135 (2006) 184.
- 1539 [59] W. Schultz, P. Dayan, P. R. Montague, A neural substrate of prediction  
1540 and reward, *Science* 275 (1997) 1593–1599.
- 1541 [60] C. Diuk, K. Tsai, J. Wallis, M. Botvinick, Y. Niv, Hierarchical learning  
1542 induces two simultaneous, but separable, prediction errors in human  
1543 basal ganglia, *Journal of Neuroscience* 33 (2013) 5797–5805.

- 1544 [61] J. J. Ribas-Fernandes, A. Solway, C. Diuk, J. T. McGuire, A. G. Barto,  
1545 Y. Niv, M. M. Botvinick, A neural signature of hierarchical reinforce-  
1546 ment learning, *Neuron* 71 (2011) 370–379.
- 1547 [62] J. J. Ribas-Fernandes, D. Shahnazian, C. B. Holroyd, M. M. Botvinick,  
1548 Subgoal-and goal-related reward prediction errors in medial prefrontal  
1549 cortex, *Journal of cognitive neuroscience* 31 (2019) 8–23.
- 1550 [63] A. C. Schapiro, T. T. Rogers, N. I. Cordova, N. B. Turk-Browne, M. M.  
1551 Botvinick, Neural representations of events arise from temporal com-  
1552 munity structure, *Nature neuroscience* 16 (2013) 486.
- 1553 [64] M. M. Botvinick, Hierarchical reinforcement learning and decision mak-  
1554 ing, *Current opinion in neurobiology* 22 (2012) 956–962.
- 1555 [65] C. B. Holroyd, N. Yeung, Motivation of extended behaviors by anterior  
1556 cingulate cortex, *Trends in cognitive sciences* 16 (2012) 122–128.
- 1557 [66] A. G. E. Collins, M. J. Frank, Neural signature of hierarchically struc-  
1558 tured expectations predicts clustering and transfer of rule sets in rein-  
1559 forcement learning, *Cognition* 152 (2016) 160–169.
- 1560 [67] S. Monsell, Task switching, *Trends in cognitive sciences* 7 (2003) 134–  
1561 140.
- 1562 [68] J. Pitman, *Combinatorial Stochastic Processes: Ecole d’Eté de Proba-  
1563 bilités de Saint-Flour XXXII-2002*, Springer, 2006.
- 1564 [69] J. X. Wang, Z. Kurth-Nelson, D. Kumaran, D. Tirumala, H. Soyer,  
1565 J. Z. Leibo, D. Hassabis, M. Botvinick, Prefrontal cortex as a meta-  
1566 reinforcement learning system, *Nature neuroscience* 21 (2018) 860.
- 1567 [70] A. G. E. Collins, M. J. Frank, Motor demands constrain cognitive rule  
1568 structures, *PLoS computational biology* 12 (2016) e1004785.
- 1569 [71] M. Sarafyazd, M. Jazayeri, Hierarchical reasoning by neural circuits in  
1570 the frontal cortex, *Science* 364 (2019) eaav8911.
- 1571 [72] R. Moran, M. Keramati, P. Dayan, R. J. Dolan, Retrospective model-  
1572 based inference guides model-free credit assignment, *Nature communi-  
1573 cations* 10 (2019) 750.

- 1574 [73] B. A. Clegg, G. J. DiGirolamo, S. W. Keele, Sequence learning, *Trends*  
1575 in cognitive sciences 2 (1998) 275–281.
- 1576 [74] G. Konidaris, A. G. Barto, Building portable options: Skill transfer in  
1577 reinforcement learning., in: *IJCAI*, volume 7, pp. 895–900.
- 1578 [75] K. R. Allen, K. A. Smith, J. B. Tenenbaum, The tools challenge: Rapid  
1579 trial-and-error learning in physical problem solving, arXiv preprint  
1580 arXiv:1907.09620 (2019).
- 1581 [76] A. G. Collins, The cost of structure learning, *Journal of Cognitive*  
1582 *Neuroscience* 29 (2017) 1646–1655.
- 1583 [77] J. Y. Angela, J. D. Cohen, Sequential effects: superstition or rational  
1584 behavior?, in: *Advances in neural information processing systems*, pp.  
1585 1873–1880.
- 1586 [78] K. L. Stachenfeld, M. M. Botvinick, S. J. Gershman, The hippocampus  
1587 as a predictive map, *Nature neuroscience* 20 (2017) 1643.
- 1588 [79] I. Momennejad, E. M. Russek, J. H. Cheong, M. M. Botvinick, N. D.  
1589 Daw, S. J. Gershman, The successor representation in human reinforce-  
1590 ment learning, *Nature Human Behaviour* 1 (2017) 680.
